# Supplementary material for: Simulating the hydrological impacts of land use conversion from annual crop to perennial forage in the Canadian Prairies using the Cold Regions Hydrological Modelling platform
Source: Copernicus journal article supplement (doi:10.5194/hess-26-5917-2022), 2022-11-25
Supplement: Supplementary file 1 [file Supplement Data_Fig 3-10.xlsx]

## Sheet: Table S1-data for Fig3-7 & 9
Table S1. CRHM predicted cumulative discharge, peak discharge, cumulative runoff, please snow water equivalent (SWE), cumulative infiltration, and cumulative evapotranspiration (ET) under annual crop and forage scenarios at the La Salle River subbasin (LS-05OG008). The years 1997-2001, 2004, and 2008 were not used for model assessment due to missing data or equipment malfunctions
Land Use	Year	Discharge (mm)	Peak Discharge (m3 s-1)	Runoff (mm)	Peak SWE (mm)	Infiltration (mm)	ET (mm)
Annual Crop	1992	74.8	9.3	60	86.6	191.6	276.2
	1993	104	6.2	83.5	83.7	250.1	304.9
	1994	59.9	2.4	34.4	49.9	264.3	311.5
	1995	115.9	8.5	82.3	74.5	174.7	279.3
	1996	173.4	14.4	145.2	118	168.1	254.5
	2002	91.8	7.7	71.1	77.8	191.7	233.2
	2003	48.1	3.2	26.6	57.7	229.6	270.1
	2005	175.4	10.7	137.5	96.3	256.8	328.9
	2006	103.6	13.8	82	111.8	147.6	229.1
	2007	95	9.2	65.8	98.1	221.1	264.8
	2009	112.3	14.1	79.4	97	210.5	288.1
	2010	114.9	8.3	91.9	63.2	305	337.6
	2011	118.5	11.9	80.7	102.6	183.7	277.1
	2012	44.6	2.7	24	56.4	266.4	264.4
	2013	126.1	12.8	98.4	110.4	175.7	274.8
Perennial Forage	1992	48.0 (5.2)	5.3 (1.7)	28.8 (9.7)	95.7 (0.0)	335 (21.2)	354.7 (0.6)
	1993	73.7 (2.5)	5.9 (1.3)	40.6 (9.5)	99.9 (0.0)	444.5 (15.1)	346 (0.0)
	1994	41.5 (3.8)	1.9 (0.1)	14.1 (3.1)	49.6 (0.0)	406.1 (7.9)	392.9 (1.9)
	1995	67.7 (5.6)	5.0 (1.3)	31.0 (11)	78.2 (0.0)	323.1 (10.2)	363.5 (3)
	1996	124.7 (18.7)	14.6 (3.8)	86.4 (23.2)	136.2 (0.0)	317.3 (19.4)	348.9 (1.7)
	2002	69.2 (4.8)	5.9 (0.9)	38.2 (6.8)	85.9 (0.0)	306.6 (18.4)	319.5 (2.9)
	2003	30.1 (2.0)	1.5 (0.6)	6.5 (2.8)	57.6 (0.0)	368.9 (10.3)	349.2 (1.5)
	2005	146.7 (10.8)	9.0 (1.4)	83.4 (11)	107.5 (0.0)	352.7 (5.2)	405.4 (0.0)
	2006	65.1 (10.5)	10.0 (2.7)	41.5 (12.7)	119.1 (0.0)	235.9 (17)	371.7 (6.1)
	2007	45.6 (7.4)	3.8 (1.1)	29.4 (9.8)	109.1 (0.0)	389.3 (21.1)	384.5 (4.5)
	2009	74.0 (6.2)	10.4 (2.8)	49.2 (13.5)	107.2 (0.0)	334.8 (15)	374.8 (1.4)
	2010	61.2 (4.1)	4.6 (0.3)	32.1 (4.4)	64.3 (0.0)	540 (11.2)	442.8 (0.7)
	2011	72.8 (9.7)	6.8 (2.5)	32.4 (15.1)	106.2 (0.0)	299.4 (16.5)	403.1 (3.8)
	2012	21.4 (2.5)	2.2 (0.5)	10.2 (2.3)	56.3 (0.0)	383.3 (10.1)	373.3 (4.3)
	2013	72.5 (13.8)	9.1 (2.6)	56.6 (16.8)	128.7 (0.0)	323 (29.4)	375.8 (5)

## Sheet: Tabel S2-data for Fig8
Table S2. Precited daily soil moisture under annual crop model and perennial forages
Land Use	Date	Soil Moisture (mm)	95% Confidence Interval
			Lower bound	Upper bound
Annual Crop	1992-01-01	311.799	0	0
Annual Crop	1992-01-02	311.685	0	0
Annual Crop	1992-01-03	311.579	0	0
Annual Crop	1992-01-04	311.465	0	0
Annual Crop	1992-01-05	336.962	0	0
Annual Crop	1992-01-06	316.575	0	0
Annual Crop	1992-01-07	299.664	0	0
Annual Crop	1992-01-08	271.403	0	0
Annual Crop	1992-01-09	265.637	0	0
Annual Crop	1992-01-10	288.73	0	0
Annual Crop	1992-01-11	275.986	0	0
Annual Crop	1992-01-12	280.604	0	0
Annual Crop	1992-01-13	311.755	0	0
Annual Crop	1992-01-14	311.751	0	0
Annual Crop	1992-01-15	311.747	0	0
Annual Crop	1992-01-16	311.744	0	0
Annual Crop	1992-01-17	311.74	0	0
Annual Crop	1992-01-18	311.736	0	0
Annual Crop	1992-01-19	311.733	0	0
Annual Crop	1992-01-20	311.729	0	0
Annual Crop	1992-01-21	311.725	0	0
Annual Crop	1992-01-22	311.722	0	0
Annual Crop	1992-01-23	311.718	0	0
Annual Crop	1992-01-24	311.714	0	0
Annual Crop	1992-01-25	311.711	0	0
Annual Crop	1992-01-26	311.707	0	0
Annual Crop	1992-01-27	311.703	0	0
Annual Crop	1992-01-28	311.7	0	0
Annual Crop	1992-01-29	311.696	0	0
Annual Crop	1992-01-30	311.692	0	0
Annual Crop	1992-01-31	311.689	0	0
Annual Crop	1992-02-01	311.795	0	0
Annual Crop	1992-02-02	311.681	0	0
Annual Crop	1992-02-03	311.575	0	0
Annual Crop	1992-02-04	311.462	0	0
Annual Crop	1992-02-05	336.878	0	0
Annual Crop	1992-02-06	314.208	0	0
Annual Crop	1992-02-07	303.651	0	0
Annual Crop	1992-02-08	270.528	0	0
Annual Crop	1992-02-09	267.795	0	0
Annual Crop	1992-02-10	287.63	0	0
Annual Crop	1992-02-11	275.907	0	0
Annual Crop	1992-02-12	280.6	0	0
Annual Crop	1992-02-13	311.641	0	0
Annual Crop	1992-02-14	311.637	0	0
Annual Crop	1992-02-15	311.634	0	0
Annual Crop	1992-02-16	311.63	0	0
Annual Crop	1992-02-17	311.626	0	0
Annual Crop	1992-02-18	311.623	0	0
Annual Crop	1992-02-19	311.619	0	0
Annual Crop	1992-02-20	311.615	0	0
Annual Crop	1992-02-21	311.612	0	0
Annual Crop	1992-02-22	311.608	0	0
Annual Crop	1992-02-23	311.604	0	0
Annual Crop	1992-02-24	311.601	0	0
Annual Crop	1992-02-25	311.597	0	0
Annual Crop	1992-02-26	311.593	0	0
Annual Crop	1992-02-27	311.59	0	0
Annual Crop	1992-02-28	311.586	0	0
Annual Crop	1992-02-29	311.582	0	0
Annual Crop	1992-03-01	311.791	0	0
Annual Crop	1992-03-02	311.678	0	0
Annual Crop	1992-03-03	311.572	0	0
Annual Crop	1992-03-04	311.458	0	0
Annual Crop	1992-03-05	336.795	0	0
Annual Crop	1992-03-06	312.469	0	0
Annual Crop	1992-03-07	305.17	0	0
Annual Crop	1992-03-08	268.47	0	0
Annual Crop	1992-03-09	267.818	0	0
Annual Crop	1992-03-10	286.706	0	0
Annual Crop	1992-03-11	276.049	0	0
Annual Crop	1992-03-12	280.596	0	0
Annual Crop	1992-03-13	311.535	0	0
Annual Crop	1992-03-14	311.531	0	0
Annual Crop	1992-03-15	311.528	0	0
Annual Crop	1992-03-16	311.524	0	0
Annual Crop	1992-03-17	311.52	0	0
Annual Crop	1992-03-18	311.517	0	0
Annual Crop	1992-03-19	311.513	0	0
Annual Crop	1992-03-20	311.509	0	0
Annual Crop	1992-03-21	311.506	0	0
Annual Crop	1992-03-22	311.502	0	0
Annual Crop	1992-03-23	311.498	0	0
Annual Crop	1992-03-24	311.495	0	0
Annual Crop	1992-03-25	311.491	0	0
Annual Crop	1992-03-26	311.487	0	0
Annual Crop	1992-03-27	311.484	0	0
Annual Crop	1992-03-28	311.48	0	0
Annual Crop	1992-03-29	311.476	0	0
Annual Crop	1992-03-30	311.473	0	0
Annual Crop	1992-03-31	311.469	0	0
Annual Crop	1992-04-01	311.788	0	0
Annual Crop	1992-04-02	311.674	0	0
Annual Crop	1992-04-03	311.568	0	0
Annual Crop	1992-04-04	311.454	0	0
Annual Crop	1992-04-05	336.706	0	0
Annual Crop	1992-04-06	319.178	0	0
Annual Crop	1992-04-07	306.551	0	0
Annual Crop	1992-04-08	266.404	0	0
Annual Crop	1992-04-09	267.362	0	0
Annual Crop	1992-04-10	285.93	0	0
Annual Crop	1992-04-11	276.047	0	0
Annual Crop	1992-04-12	280.593	0	0
Annual Crop	1992-04-13	311.421	0	0
Annual Crop	1992-04-14	311.547	0	0
Annual Crop	1992-04-15	313.642	0	0
Annual Crop	1992-04-16	315.741	0	0
Annual Crop	1992-04-17	315.695	0	0
Annual Crop	1992-04-18	316.83	0	0
Annual Crop	1992-04-19	329.7	0	0
Annual Crop	1992-04-20	330.505	0	0
Annual Crop	1992-04-21	330.501	0	0
Annual Crop	1992-04-22	330.498	0	0
Annual Crop	1992-04-23	330.495	0	0
Annual Crop	1992-04-24	331.098	0	0
Annual Crop	1992-04-25	333.109	0	0
Annual Crop	1992-04-26	335.011	0	0
Annual Crop	1992-04-27	335.457	0	0
Annual Crop	1992-04-28	336.045	0	0
Annual Crop	1992-04-29	337.129	0	0
Annual Crop	1992-04-30	337.045	0	0
Annual Crop	1992-05-01	311.784	0	0
Annual Crop	1992-05-02	311.67	0	0
Annual Crop	1992-05-03	311.564	0	0
Annual Crop	1992-05-04	311.451	0	0
Annual Crop	1992-05-05	336.097	0	0
Annual Crop	1992-05-06	322.317	0	0
Annual Crop	1992-05-07	305.276	0	0
Annual Crop	1992-05-08	264.286	0	0
Annual Crop	1992-05-09	267.131	0	0
Annual Crop	1992-05-10	285.844	0	0
Annual Crop	1992-05-11	276.043	0	0
Annual Crop	1992-05-12	280.589	0	0
Annual Crop	1992-05-13	340.215	0	0
Annual Crop	1992-05-14	341.371	0	0
Annual Crop	1992-05-15	341.907	0	0
Annual Crop	1992-05-16	341.431	0	0
Annual Crop	1992-05-17	340.006	0	0
Annual Crop	1992-05-18	338.512	0	0
Annual Crop	1992-05-19	337.063	0	0
Annual Crop	1992-05-20	335.571	0	0
Annual Crop	1992-05-21	334.335	0	0
Annual Crop	1992-05-22	333.395	0	0
Annual Crop	1992-05-23	332.177	0	0
Annual Crop	1992-05-24	330.423	0	0
Annual Crop	1992-05-25	328.62	0	0
Annual Crop	1992-05-26	326.681	0	0
Annual Crop	1992-05-27	324.599	0	0
Annual Crop	1992-05-28	322.742	0	0
Annual Crop	1992-05-29	321.043	0	0
Annual Crop	1992-05-30	320.583	0	0
Annual Crop	1992-05-31	318.774	0	0
Annual Crop	1992-06-01	311.78	0	0
Annual Crop	1992-06-02	311.667	0	0
Annual Crop	1992-06-03	311.561	0	0
Annual Crop	1992-06-04	311.447	0	0
Annual Crop	1992-06-05	334.956	0	0
Annual Crop	1992-06-06	325.354	0	0
Annual Crop	1992-06-07	304.456	0	0
Annual Crop	1992-06-08	262.279	0	0
Annual Crop	1992-06-09	266.874	0	0
Annual Crop	1992-06-10	285.54	0	0
Annual Crop	1992-06-11	276.04	0	0
Annual Crop	1992-06-12	280.585	0	0
Annual Crop	1992-06-13	313.354	0	0
Annual Crop	1992-06-14	310.883	0	0
Annual Crop	1992-06-15	308.738	0	0
Annual Crop	1992-06-16	307.518	0	0
Annual Crop	1992-06-17	311.011	0	0
Annual Crop	1992-06-18	312.039	0	0
Annual Crop	1992-06-19	311.459	0	0
Annual Crop	1992-06-20	309.301	0	0
Annual Crop	1992-06-21	310.02	0	0
Annual Crop	1992-06-22	310.38	0	0
Annual Crop	1992-06-23	309.536	0	0
Annual Crop	1992-06-24	308.314	0	0
Annual Crop	1992-06-25	309.832	0	0
Annual Crop	1992-06-26	309.41	0	0
Annual Crop	1992-06-27	307.975	0	0
Annual Crop	1992-06-28	305.751	0	0
Annual Crop	1992-06-29	303.206	0	0
Annual Crop	1992-06-30	300.464	0	0
Annual Crop	1992-07-01	311.777	0	0
Annual Crop	1992-07-02	311.663	0	0
Annual Crop	1992-07-03	311.557	0	0
Annual Crop	1992-07-04	311.443	0	0
Annual Crop	1992-07-05	333.618	0	0
Annual Crop	1992-07-06	326.514	0	0
Annual Crop	1992-07-07	302.618	0	0
Annual Crop	1992-07-08	260.461	0	0
Annual Crop	1992-07-09	266.485	0	0
Annual Crop	1992-07-10	284.712	0	0
Annual Crop	1992-07-11	276.036	0	0
Annual Crop	1992-07-12	280.582	0	0
Annual Crop	1992-07-13	288.304	0	0
Annual Crop	1992-07-14	287.275	0	0
Annual Crop	1992-07-15	291.315	0	0
Annual Crop	1992-07-16	291.234	0	0
Annual Crop	1992-07-17	288.96	0	0
Annual Crop	1992-07-18	288.403	0	0
Annual Crop	1992-07-19	288.232	0	0
Annual Crop	1992-07-20	285.54	0	0
Annual Crop	1992-07-21	281.915	0	0
Annual Crop	1992-07-22	278.057	0	0
Annual Crop	1992-07-23	274.929	0	0
Annual Crop	1992-07-24	273.548	0	0
Annual Crop	1992-07-25	274.355	0	0
Annual Crop	1992-07-26	274.648	0	0
Annual Crop	1992-07-27	275.816	0	0
Annual Crop	1992-07-28	274.805	0	0
Annual Crop	1992-07-29	272.458	0	0
Annual Crop	1992-07-30	270.176	0	0
Annual Crop	1992-07-31	270.254	0	0
Annual Crop	1992-08-01	311.773	0	0
Annual Crop	1992-08-02	311.659	0	0
Annual Crop	1992-08-03	311.553	0	0
Annual Crop	1992-08-04	311.44	0	0
Annual Crop	1992-08-05	334.379	0	0
Annual Crop	1992-08-06	324.755	0	0
Annual Crop	1992-08-07	300.563	0	0
Annual Crop	1992-08-08	261.233	0	0
Annual Crop	1992-08-09	267.47	0	0
Annual Crop	1992-08-10	283.979	0	0
Annual Crop	1992-08-11	276.033	0	0
Annual Crop	1992-08-12	280.578	0	0
Annual Crop	1992-08-13	258.805	0	0
Annual Crop	1992-08-14	256.696	0	0
Annual Crop	1992-08-15	254.668	0	0
Annual Crop	1992-08-16	257.305	0	0
Annual Crop	1992-08-17	258.961	0	0
Annual Crop	1992-08-18	257.025	0	0
Annual Crop	1992-08-19	255.788	0	0
Annual Crop	1992-08-20	257	0	0
Annual Crop	1992-08-21	256.894	0	0
Annual Crop	1992-08-22	257.114	0	0
Annual Crop	1992-08-23	260.338	0	0
Annual Crop	1992-08-24	263.397	0	0
Annual Crop	1992-08-25	263.38	0	0
Annual Crop	1992-08-26	262.611	0	0
Annual Crop	1992-08-27	261.103	0	0
Annual Crop	1992-08-28	259.597	0	0
Annual Crop	1992-08-29	259.658	0	0
Annual Crop	1992-08-30	264.718	0	0
Annual Crop	1992-08-31	265.601	0	0
Annual Crop	1992-09-01	311.769	0	0
Annual Crop	1992-09-02	311.656	0	0
Annual Crop	1992-09-03	311.55	0	0
Annual Crop	1992-09-04	311.436	0	0
Annual Crop	1992-09-05	333.861	0	0
Annual Crop	1992-09-06	322.703	0	0
Annual Crop	1992-09-07	298.965	0	0
Annual Crop	1992-09-08	261.27	0	0
Annual Crop	1992-09-09	270.674	0	0
Annual Crop	1992-09-10	283.116	0	0
Annual Crop	1992-09-11	277.618	0	0
Annual Crop	1992-09-12	280.574	0	0
Annual Crop	1992-09-13	279.575	0	0
Annual Crop	1992-09-14	278.761	0	0
Annual Crop	1992-09-15	279.457	0	0
Annual Crop	1992-09-16	281.582	0	0
Annual Crop	1992-09-17	285.487	0	0
Annual Crop	1992-09-18	287.196	0	0
Annual Crop	1992-09-19	287.165	0	0
Annual Crop	1992-09-20	286.647	0	0
Annual Crop	1992-09-21	285.807	0	0
Annual Crop	1992-09-22	285.023	0	0
Annual Crop	1992-09-23	284.074	0	0
Annual Crop	1992-09-24	283.236	0	0
Annual Crop	1992-09-25	282.664	0	0
Annual Crop	1992-09-26	282.128	0	0
Annual Crop	1992-09-27	286.953	0	0
Annual Crop	1992-09-28	290.073	0	0
Annual Crop	1992-09-29	290.431	0	0
Annual Crop	1992-09-30	290.072	0	0
Annual Crop	1992-10-01	311.766	0	0
Annual Crop	1992-10-02	311.652	0	0
Annual Crop	1992-10-03	311.546	0	0
Annual Crop	1992-10-04	311.432	0	0
Annual Crop	1992-10-05	336.584	0	0
Annual Crop	1992-10-06	320.587	0	0
Annual Crop	1992-10-07	298.389	0	0
Annual Crop	1992-10-08	261.575	0	0
Annual Crop	1992-10-09	276.364	0	0
Annual Crop	1992-10-10	282.29	0	0
Annual Crop	1992-10-11	280.677	0	0
Annual Crop	1992-10-12	280.571	0	0
Annual Crop	1992-10-13	280.968	0	0
Annual Crop	1992-10-14	280.69	0	0
Annual Crop	1992-10-15	280.204	0	0
Annual Crop	1992-10-16	279.848	0	0
Annual Crop	1992-10-17	279.661	0	0
Annual Crop	1992-10-18	279.471	0	0
Annual Crop	1992-10-19	279.26	0	0
Annual Crop	1992-10-20	279.257	0	0
Annual Crop	1992-10-21	279.94	0	0
Annual Crop	1992-10-22	280.325	0	0
Annual Crop	1992-10-23	279.629	0	0
Annual Crop	1992-10-24	278.983	0	0
Annual Crop	1992-10-25	278.465	0	0
Annual Crop	1992-10-26	277.958	0	0
Annual Crop	1992-10-27	277.465	0	0
Annual Crop	1992-10-28	277.123	0	0
Annual Crop	1992-10-29	276.706	0	0
Annual Crop	1992-10-30	276.399	0	0
Annual Crop	1992-10-31	276.197	0	0
Annual Crop	1992-11-01	311.762	0	0
Annual Crop	1992-11-02	311.648	0	0
Annual Crop	1992-11-03	311.542	0	0
Annual Crop	1992-11-04	311.429	0	0
Annual Crop	1992-11-05	341.873	0	0
Annual Crop	1992-11-06	318.393	0	0
Annual Crop	1992-11-07	295.433	0	0
Annual Crop	1992-11-08	262.208	0	0
Annual Crop	1992-11-09	276.991	0	0
Annual Crop	1992-11-10	281.754	0	0
Annual Crop	1992-11-11	280.674	0	0
Annual Crop	1992-11-12	280.567	0	0
Annual Crop	1992-11-13	280.67	0	0
Annual Crop	1992-11-14	280.666	0	0
Annual Crop	1992-11-15	280.662	0	0
Annual Crop	1992-11-16	280.659	0	0
Annual Crop	1992-11-17	280.655	0	0
Annual Crop	1992-11-18	280.651	0	0
Annual Crop	1992-11-19	280.648	0	0
Annual Crop	1992-11-20	280.644	0	0
Annual Crop	1992-11-21	280.64	0	0
Annual Crop	1992-11-22	280.637	0	0
Annual Crop	1992-11-23	280.633	0	0
Annual Crop	1992-11-24	280.629	0	0
Annual Crop	1992-11-25	280.626	0	0
Annual Crop	1992-11-26	280.622	0	0
Annual Crop	1992-11-27	280.618	0	0
Annual Crop	1992-11-28	280.615	0	0
Annual Crop	1992-11-29	280.611	0	0
Annual Crop	1992-11-30	280.607	0	0
Annual Crop	1992-12-01	311.758	0	0
Annual Crop	1992-12-02	311.645	0	0
Annual Crop	1992-12-03	311.539	0	0
Annual Crop	1992-12-04	311.425	0	0
Annual Crop	1992-12-05	341.421	0	0
Annual Crop	1992-12-06	315.999	0	0
Annual Crop	1992-12-07	291.943	0	0
Annual Crop	1992-12-08	260.72	0	0
Annual Crop	1992-12-09	277.766	0	0
Annual Crop	1992-12-10	281.329	0	0
Annual Crop	1992-12-11	280.673	0	0
Annual Crop	1992-12-12	280.563	0	0
Annual Crop	1992-12-13	280.56	0	0
Annual Crop	1992-12-14	280.556	0	0
Annual Crop	1992-12-15	280.552	0	0
Annual Crop	1992-12-16	280.549	0	0
Annual Crop	1992-12-17	280.545	0	0
Annual Crop	1992-12-18	280.541	0	0
Annual Crop	1992-12-19	280.538	0	0
Annual Crop	1992-12-20	280.534	0	0
Annual Crop	1992-12-21	280.53	0	0
Annual Crop	1992-12-22	280.527	0	0
Annual Crop	1992-12-23	280.523	0	0
Annual Crop	1992-12-24	280.519	0	0
Annual Crop	1992-12-25	280.516	0	0
Annual Crop	1992-12-26	280.512	0	0
Annual Crop	1992-12-27	280.508	0	0
Annual Crop	1992-12-28	280.505	0	0
Annual Crop	1992-12-29	280.501	0	0
Annual Crop	1992-12-30	280.497	0	0
Annual Crop	1992-12-31	280.494	0	0
Annual Crop	1993-01-01	280.49	0	0
Annual Crop	1993-01-02	280.377	0	0
Annual Crop	1993-01-03	280.274	0	0
Annual Crop	1993-01-04	283.08	0	0
Annual Crop	1993-01-05	291.526	0	0
Annual Crop	1993-01-06	292.03	0	0
Annual Crop	1993-01-07	289.797	0	0
Annual Crop	1993-01-08	301.753	0	0
Annual Crop	1993-01-09	320.775	0	0
Annual Crop	1993-01-10	319.618	0	0
Annual Crop	1993-01-11	334.391	0	0
Annual Crop	1993-01-12	337.343	0	0
Annual Crop	1993-01-13	280.446	0	0
Annual Crop	1993-01-14	280.443	0	0
Annual Crop	1993-01-15	280.439	0	0
Annual Crop	1993-01-16	280.435	0	0
Annual Crop	1993-01-17	280.432	0	0
Annual Crop	1993-01-18	280.428	0	0
Annual Crop	1993-01-19	280.424	0	0
Annual Crop	1993-01-20	280.421	0	0
Annual Crop	1993-01-21	280.417	0	0
Annual Crop	1993-01-22	280.413	0	0
Annual Crop	1993-01-23	280.41	0	0
Annual Crop	1993-01-24	280.406	0	0
Annual Crop	1993-01-25	280.402	0	0
Annual Crop	1993-01-26	280.399	0	0
Annual Crop	1993-01-27	280.395	0	0
Annual Crop	1993-01-28	280.391	0	0
Annual Crop	1993-01-29	280.388	0	0
Annual Crop	1993-01-30	280.384	0	0
Annual Crop	1993-01-31	280.38	0	0
Annual Crop	1993-02-01	280.486	0	0
Annual Crop	1993-02-02	280.373	0	0
Annual Crop	1993-02-03	280.27	0	0
Annual Crop	1993-02-04	283.054	0	0
Annual Crop	1993-02-05	291.024	0	0
Annual Crop	1993-02-06	290.141	0	0
Annual Crop	1993-02-07	291.265	0	0
Annual Crop	1993-02-08	301.04	0	0
Annual Crop	1993-02-09	321.065	0	0
Annual Crop	1993-02-10	319.505	0	0
Annual Crop	1993-02-11	334.683	0	0
Annual Crop	1993-02-12	337.34	0	0
Annual Crop	1993-02-13	280.333	0	0
Annual Crop	1993-02-14	280.329	0	0
Annual Crop	1993-02-15	280.325	0	0
Annual Crop	1993-02-16	280.322	0	0
Annual Crop	1993-02-17	280.318	0	0
Annual Crop	1993-02-18	280.314	0	0
Annual Crop	1993-02-19	280.311	0	0
Annual Crop	1993-02-20	280.307	0	0
Annual Crop	1993-02-21	280.303	0	0
Annual Crop	1993-02-22	280.3	0	0
Annual Crop	1993-02-23	280.296	0	0
Annual Crop	1993-02-24	280.292	0	0
Annual Crop	1993-02-25	280.289	0	0
Annual Crop	1993-02-26	280.285	0	0
Annual Crop	1993-02-27	280.281	0	0
Annual Crop	1993-02-28	280.278	0	0
Annual Crop	1993-03-01	280.483	0	0
Annual Crop	1993-03-02	280.369	0	0
Annual Crop	1993-03-03	280.267	0	0
Annual Crop	1993-03-04	283.028	0	0
Annual Crop	1993-03-05	289.729	0	0
Annual Crop	1993-03-06	288.061	0	0
Annual Crop	1993-03-07	294.588	0	0
Annual Crop	1993-03-08	300.065	0	0
Annual Crop	1993-03-09	320.834	0	0
Annual Crop	1993-03-10	320.545	0	0
Annual Crop	1993-03-11	334.553	0	0
Annual Crop	1993-03-12	337.337	0	0
Annual Crop	1993-03-13	280.23	0	0
Annual Crop	1993-03-14	280.226	0	0
Annual Crop	1993-03-15	280.223	0	0
Annual Crop	1993-03-16	280.219	0	0
Annual Crop	1993-03-17	280.216	0	0
Annual Crop	1993-03-18	280.212	0	0
Annual Crop	1993-03-19	280.208	0	0
Annual Crop	1993-03-20	280.205	0	0
Annual Crop	1993-03-21	280.201	0	0
Annual Crop	1993-03-22	280.197	0	0
Annual Crop	1993-03-23	280.194	0	0
Annual Crop	1993-03-24	280.19	0	0
Annual Crop	1993-03-25	280.188	0	0
Annual Crop	1993-03-26	280.185	0	0
Annual Crop	1993-03-27	281.547	0	0
Annual Crop	1993-03-28	282.263	0	0
Annual Crop	1993-03-29	282.77	0	0
Annual Crop	1993-03-30	283.127	0	0
Annual Crop	1993-03-31	283.107	0	0
Annual Crop	1993-04-01	280.479	0	0
Annual Crop	1993-04-02	280.366	0	0
Annual Crop	1993-04-03	280.263	0	0
Annual Crop	1993-04-04	283.003	0	0
Annual Crop	1993-04-05	288.546	0	0
Annual Crop	1993-04-06	285.631	0	0
Annual Crop	1993-04-07	294.828	0	0
Annual Crop	1993-04-08	301.858	0	0
Annual Crop	1993-04-09	322.712	0	0
Annual Crop	1993-04-10	321.216	0	0
Annual Crop	1993-04-11	334.416	0	0
Annual Crop	1993-04-12	337.334	0	0
Annual Crop	1993-04-13	286.487	0	0
Annual Crop	1993-04-14	286.471	0	0
Annual Crop	1993-04-15	286.442	0	0
Annual Crop	1993-04-16	286.414	0	0
Annual Crop	1993-04-17	285.985	0	0
Annual Crop	1993-04-18	285.056	0	0
Annual Crop	1993-04-19	283.992	0	0
Annual Crop	1993-04-20	282.889	0	0
Annual Crop	1993-04-21	281.738	0	0
Annual Crop	1993-04-22	280.234	0	0
Annual Crop	1993-04-23	278.66	0	0
Annual Crop	1993-04-24	277.985	0	0
Annual Crop	1993-04-25	277.304	0	0
Annual Crop	1993-04-26	276.501	0	0
Annual Crop	1993-04-27	285.639	0	0
Annual Crop	1993-04-28	289.611	0	0
Annual Crop	1993-04-29	291	0	0
Annual Crop	1993-04-30	291.555	0	0
Annual Crop	1993-05-01	280.476	0	0
Annual Crop	1993-05-02	280.362	0	0
Annual Crop	1993-05-03	280.259	0	0
Annual Crop	1993-05-04	282.989	0	0
Annual Crop	1993-05-05	287.129	0	0
Annual Crop	1993-05-06	283.217	0	0
Annual Crop	1993-05-07	299.781	0	0
Annual Crop	1993-05-08	300.705	0	0
Annual Crop	1993-05-09	321.871	0	0
Annual Crop	1993-05-10	320.717	0	0
Annual Crop	1993-05-11	334.384	0	0
Annual Crop	1993-05-12	337.331	0	0
Annual Crop	1993-05-13	307.614	0	0
Annual Crop	1993-05-14	308.759	0	0
Annual Crop	1993-05-15	309.533	0	0
Annual Crop	1993-05-16	309.669	0	0
Annual Crop	1993-05-17	309.299	0	0
Annual Crop	1993-05-18	308.387	0	0
Annual Crop	1993-05-19	307.301	0	0
Annual Crop	1993-05-20	306.031	0	0
Annual Crop	1993-05-21	304.636	0	0
Annual Crop	1993-05-22	303.209	0	0
Annual Crop	1993-05-23	302.281	0	0
Annual Crop	1993-05-24	301.361	0	0
Annual Crop	1993-05-25	301.188	0	0
Annual Crop	1993-05-26	300.967	0	0
Annual Crop	1993-05-27	299.983	0	0
Annual Crop	1993-05-28	298.835	0	0
Annual Crop	1993-05-29	296.847	0	0
Annual Crop	1993-05-30	295.574	0	0
Annual Crop	1993-05-31	293.898	0	0
Annual Crop	1993-06-01	280.472	0	0
Annual Crop	1993-06-02	280.358	0	0
Annual Crop	1993-06-03	280.256	0	0
Annual Crop	1993-06-04	282.976	0	0
Annual Crop	1993-06-05	285.647	0	0
Annual Crop	1993-06-06	281.232	0	0
Annual Crop	1993-06-07	303.219	0	0
Annual Crop	1993-06-08	297.424	0	0
Annual Crop	1993-06-09	322.422	0	0
Annual Crop	1993-06-10	320.233	0	0
Annual Crop	1993-06-11	334.376	0	0
Annual Crop	1993-06-12	337.328	0	0
Annual Crop	1993-06-13	284	0	0
Annual Crop	1993-06-14	283.525	0	0
Annual Crop	1993-06-15	285.128	0	0
Annual Crop	1993-06-16	287.622	0	0
Annual Crop	1993-06-17	288.217	0	0
Annual Crop	1993-06-18	285.25	0	0
Annual Crop	1993-06-19	282.038	0	0
Annual Crop	1993-06-20	281.937	0	0
Annual Crop	1993-06-21	283.089	0	0
Annual Crop	1993-06-22	283.413	0	0
Annual Crop	1993-06-23	283.211	0	0
Annual Crop	1993-06-24	282.826	0	0
Annual Crop	1993-06-25	282.77	0	0
Annual Crop	1993-06-26	282.476	0	0
Annual Crop	1993-06-27	283.2	0	0
Annual Crop	1993-06-28	281.796	0	0
Annual Crop	1993-06-29	283.734	0	0
Annual Crop	1993-06-30	286.682	0	0
Annual Crop	1993-07-01	280.468	0	0
Annual Crop	1993-07-02	280.355	0	0
Annual Crop	1993-07-03	280.252	0	0
Annual Crop	1993-07-04	282.958	0	0
Annual Crop	1993-07-05	288.007	0	0
Annual Crop	1993-07-06	282.462	0	0
Annual Crop	1993-07-07	303.364	0	0
Annual Crop	1993-07-08	293.912	0	0
Annual Crop	1993-07-09	320.866	0	0
Annual Crop	1993-07-10	319.98	0	0
Annual Crop	1993-07-11	334.649	0	0
Annual Crop	1993-07-12	337.325	0	0
Annual Crop	1993-07-13	297.338	0	0
Annual Crop	1993-07-14	294.407	0	0
Annual Crop	1993-07-15	293.112	0	0
Annual Crop	1993-07-16	295.689	0	0
Annual Crop	1993-07-17	297.8	0	0
Annual Crop	1993-07-18	301.182	0	0
Annual Crop	1993-07-19	303.633	0	0
Annual Crop	1993-07-20	302.008	0	0
Annual Crop	1993-07-21	300.469	0	0
Annual Crop	1993-07-22	300.303	0	0
Annual Crop	1993-07-23	300.351	0	0
Annual Crop	1993-07-24	300.938	0	0
Annual Crop	1993-07-25	302.822	0	0
Annual Crop	1993-07-26	303.005	0	0
Annual Crop	1993-07-27	305.738	0	0
Annual Crop	1993-07-28	306.518	0	0
Annual Crop	1993-07-29	306.473	0	0
Annual Crop	1993-07-30	305.724	0	0
Annual Crop	1993-07-31	304.019	0	0
Annual Crop	1993-08-01	280.465	0	0
Annual Crop	1993-08-02	280.351	0	0
Annual Crop	1993-08-03	280.248	0	0
Annual Crop	1993-08-04	282.932	0	0
Annual Crop	1993-08-05	297.22	0	0
Annual Crop	1993-08-06	284.12	0	0
Annual Crop	1993-08-07	303.322	0	0
Annual Crop	1993-08-08	302.582	0	0
Annual Crop	1993-08-09	320.75	0	0
Annual Crop	1993-08-10	319.699	0	0
Annual Crop	1993-08-11	334.95	0	0
Annual Crop	1993-08-12	337.322	0	0
Annual Crop	1993-08-13	315.372	0	0
Annual Crop	1993-08-14	315.711	0	0
Annual Crop	1993-08-15	319.556	0	0
Annual Crop	1993-08-16	319.496	0	0
Annual Crop	1993-08-17	319.785	0	0
Annual Crop	1993-08-18	324.634	0	0
Annual Crop	1993-08-19	325.098	0	0
Annual Crop	1993-08-20	322.404	0	0
Annual Crop	1993-08-21	319.117	0	0
Annual Crop	1993-08-22	316.54	0	0
Annual Crop	1993-08-23	315.799	0	0
Annual Crop	1993-08-24	315.914	0	0
Annual Crop	1993-08-25	313.831	0	0
Annual Crop	1993-08-26	316.9	0	0
Annual Crop	1993-08-27	318.408	0	0
Annual Crop	1993-08-28	316.928	0	0
Annual Crop	1993-08-29	319.266	0	0
Annual Crop	1993-08-30	320.281	0	0
Annual Crop	1993-08-31	320.643	0	0
Annual Crop	1993-09-01	280.461	0	0
Annual Crop	1993-09-02	280.347	0	0
Annual Crop	1993-09-03	280.245	0	0
Annual Crop	1993-09-04	282.906	0	0
Annual Crop	1993-09-05	306.602	0	0
Annual Crop	1993-09-06	284.692	0	0
Annual Crop	1993-09-07	303.281	0	0
Annual Crop	1993-09-08	306.438	0	0
Annual Crop	1993-09-09	325.017	0	0
Annual Crop	1993-09-10	319.115	0	0
Annual Crop	1993-09-11	334.947	0	0
Annual Crop	1993-09-12	337.319	0	0
Annual Crop	1993-09-13	325.166	0	0
Annual Crop	1993-09-14	324.351	0	0
Annual Crop	1993-09-15	323.202	0	0
Annual Crop	1993-09-16	323.48	0	0
Annual Crop	1993-09-17	323.295	0	0
Annual Crop	1993-09-18	322.495	0	0
Annual Crop	1993-09-19	321.521	0	0
Annual Crop	1993-09-20	320.494	0	0
Annual Crop	1993-09-21	319.8	0	0
Annual Crop	1993-09-22	321.2	0	0
Annual Crop	1993-09-23	320.304	0	0
Annual Crop	1993-09-24	319.375	0	0
Annual Crop	1993-09-25	319.494	0	0
Annual Crop	1993-09-26	320.048	0	0
Annual Crop	1993-09-27	319.556	0	0
Annual Crop	1993-09-28	318.886	0	0
Annual Crop	1993-09-29	318.672	0	0
Annual Crop	1993-09-30	319.288	0	0
Annual Crop	1993-10-01	280.457	0	0
Annual Crop	1993-10-02	280.344	0	0
Annual Crop	1993-10-03	280.241	0	0
Annual Crop	1993-10-04	282.88	0	0
Annual Crop	1993-10-05	308.153	0	0
Annual Crop	1993-10-06	285.402	0	0
Annual Crop	1993-10-07	303.239	0	0
Annual Crop	1993-10-08	306.393	0	0
Annual Crop	1993-10-09	324.308	0	0
Annual Crop	1993-10-10	318.339	0	0
Annual Crop	1993-10-11	334.944	0	0
Annual Crop	1993-10-12	337.316	0	0
Annual Crop	1993-10-13	316.255	0	0
Annual Crop	1993-10-14	315.527	0	0
Annual Crop	1993-10-15	314.75	0	0
Annual Crop	1993-10-16	316.351	0	0
Annual Crop	1993-10-17	316.512	0	0
Annual Crop	1993-10-18	316.445	0	0
Annual Crop	1993-10-19	316.326	0	0
Annual Crop	1993-10-20	318.79	0	0
Annual Crop	1993-10-21	319.913	0	0
Annual Crop	1993-10-22	319.922	0	0
Annual Crop	1993-10-23	319.937	0	0
Annual Crop	1993-10-24	319.674	0	0
Annual Crop	1993-10-25	320.026	0	0
Annual Crop	1993-10-26	320.058	0	0
Annual Crop	1993-10-27	322.459	0	0
Annual Crop	1993-10-28	332.975	0	0
Annual Crop	1993-10-29	333.709	0	0
Annual Crop	1993-10-30	334.496	0	0
Annual Crop	1993-10-31	334.493	0	0
Annual Crop	1993-11-01	280.454	0	0
Annual Crop	1993-11-02	280.34	0	0
Annual Crop	1993-11-03	280.237	0	0
Annual Crop	1993-11-04	282.854	0	0
Annual Crop	1993-11-05	308.106	0	0
Annual Crop	1993-11-06	283.288	0	0
Annual Crop	1993-11-07	302.534	0	0
Annual Crop	1993-11-08	309.984	0	0
Annual Crop	1993-11-09	322.906	0	0
Annual Crop	1993-11-10	317.675	0	0
Annual Crop	1993-11-11	334.941	0	0
Annual Crop	1993-11-12	337.313	0	0
Annual Crop	1993-11-13	334.935	0	0
Annual Crop	1993-11-14	334.932	0	0
Annual Crop	1993-11-15	334.93	0	0
Annual Crop	1993-11-16	334.927	0	0
Annual Crop	1993-11-17	335.781	0	0
Annual Crop	1993-11-18	336.711	0	0
Annual Crop	1993-11-19	337.083	0	0
Annual Crop	1993-11-20	337.459	0	0
Annual Crop	1993-11-21	337.401	0	0
Annual Crop	1993-11-22	337.388	0	0
Annual Crop	1993-11-23	337.378	0	0
Annual Crop	1993-11-24	337.368	0	0
Annual Crop	1993-11-25	337.359	0	0
Annual Crop	1993-11-26	337.357	0	0
Annual Crop	1993-11-27	337.354	0	0
Annual Crop	1993-11-28	337.351	0	0
Annual Crop	1993-11-29	337.349	0	0
Annual Crop	1993-11-30	337.346	0	0
Annual Crop	1993-12-01	280.45	0	0
Annual Crop	1993-12-02	280.336	0	0
Annual Crop	1993-12-03	280.234	0	0
Annual Crop	1993-12-04	284.742	0	0
Annual Crop	1993-12-05	308.06	0	0
Annual Crop	1993-12-06	283.727	0	0
Annual Crop	1993-12-07	300.189	0	0
Annual Crop	1993-12-08	315.635	0	0
Annual Crop	1993-12-09	325.324	0	0
Annual Crop	1993-12-10	317.027	0	0
Annual Crop	1993-12-11	334.938	0	0
Annual Crop	1993-12-12	337.311	0	0
Annual Crop	1993-12-13	337.308	0	0
Annual Crop	1993-12-14	337.305	0	0
Annual Crop	1993-12-15	337.302	0	0
Annual Crop	1993-12-16	337.299	0	0
Annual Crop	1993-12-17	337.296	0	0
Annual Crop	1993-12-18	337.293	0	0
Annual Crop	1993-12-19	337.29	0	0
Annual Crop	1993-12-20	337.287	0	0
Annual Crop	1993-12-21	337.284	0	0
Annual Crop	1993-12-22	337.281	0	0
Annual Crop	1993-12-23	337.278	0	0
Annual Crop	1993-12-24	337.275	0	0
Annual Crop	1993-12-25	337.272	0	0
Annual Crop	1993-12-26	337.27	0	0
Annual Crop	1993-12-27	337.267	0	0
Annual Crop	1993-12-28	337.264	0	0
Annual Crop	1993-12-29	337.261	0	0
Annual Crop	1993-12-30	337.258	0	0
Annual Crop	1993-12-31	337.255	0	0
Annual Crop	1994-01-01	337.252	0	0
Annual Crop	1994-01-02	337.161	0	0
Annual Crop	1994-01-03	337.079	0	0
Annual Crop	1994-01-04	339.855	0	0
Annual Crop	1994-01-05	327.057	0	0
Annual Crop	1994-01-06	310.234	0	0
Annual Crop	1994-01-07	289	0	0
Annual Crop	1994-01-08	265.068	0	0
Annual Crop	1994-01-09	257.736	0	0
Annual Crop	1994-01-10	261.866	0	0
Annual Crop	1994-01-11	341.471	0	0
Annual Crop	1994-01-12	359.805	0	0
Annual Crop	1994-01-13	337.217	0	0
Annual Crop	1994-01-14	337.214	0	0
Annual Crop	1994-01-15	337.211	0	0
Annual Crop	1994-01-16	337.208	0	0
Annual Crop	1994-01-17	337.205	0	0
Annual Crop	1994-01-18	337.202	0	0
Annual Crop	1994-01-19	337.199	0	0
Annual Crop	1994-01-20	337.196	0	0
Annual Crop	1994-01-21	337.193	0	0
Annual Crop	1994-01-22	337.19	0	0
Annual Crop	1994-01-23	337.188	0	0
Annual Crop	1994-01-24	337.185	0	0
Annual Crop	1994-01-25	337.182	0	0
Annual Crop	1994-01-26	337.179	0	0
Annual Crop	1994-01-27	337.176	0	0
Annual Crop	1994-01-28	337.173	0	0
Annual Crop	1994-01-29	337.17	0	0
Annual Crop	1994-01-30	337.167	0	0
Annual Crop	1994-01-31	337.164	0	0
Annual Crop	1994-02-01	337.249	0	0
Annual Crop	1994-02-02	337.158	0	0
Annual Crop	1994-02-03	337.076	0	0
Annual Crop	1994-02-04	341.288	0	0
Annual Crop	1994-02-05	325.47	0	0
Annual Crop	1994-02-06	308.184	0	0
Annual Crop	1994-02-07	285.906	0	0
Annual Crop	1994-02-08	263.827	0	0
Annual Crop	1994-02-09	256.784	0	0
Annual Crop	1994-02-10	261.544	0	0
Annual Crop	1994-02-11	341.512	0	0
Annual Crop	1994-02-12	360.704	0	0
Annual Crop	1994-02-13	337.126	0	0
Annual Crop	1994-02-14	337.123	0	0
Annual Crop	1994-02-15	337.12	0	0
Annual Crop	1994-02-16	337.117	0	0
Annual Crop	1994-02-17	337.114	0	0
Annual Crop	1994-02-18	337.111	0	0
Annual Crop	1994-02-19	337.108	0	0
Annual Crop	1994-02-20	337.106	0	0
Annual Crop	1994-02-21	337.103	0	0
Annual Crop	1994-02-22	337.1	0	0
Annual Crop	1994-02-23	337.097	0	0
Annual Crop	1994-02-24	337.094	0	0
Annual Crop	1994-02-25	337.091	0	0
Annual Crop	1994-02-26	337.088	0	0
Annual Crop	1994-02-27	337.085	0	0
Annual Crop	1994-02-28	337.082	0	0
Annual Crop	1994-03-01	337.246	0	0
Annual Crop	1994-03-02	337.155	0	0
Annual Crop	1994-03-03	337.073	0	0
Annual Crop	1994-03-04	341.764	0	0
Annual Crop	1994-03-05	326.785	0	0
Annual Crop	1994-03-06	306.357	0	0
Annual Crop	1994-03-07	286.854	0	0
Annual Crop	1994-03-08	262.828	0	0
Annual Crop	1994-03-09	260.157	0	0
Annual Crop	1994-03-10	261.232	0	0
Annual Crop	1994-03-11	341.642	0	0
Annual Crop	1994-03-12	361.687	0	0
Annual Crop	1994-03-13	337.014	0	0
Annual Crop	1994-03-14	336.987	0	0
Annual Crop	1994-03-15	336.942	0	0
Annual Crop	1994-03-16	336.866	0	0
Annual Crop	1994-03-17	336.848	0	0
Annual Crop	1994-03-18	336.805	0	0
Annual Crop	1994-03-19	337	0	0
Annual Crop	1994-03-20	337.071	0	0
Annual Crop	1994-03-21	338.066	0	0
Annual Crop	1994-03-22	339.154	0	0
Annual Crop	1994-03-23	339.151	0	0
Annual Crop	1994-03-24	339.38	0	0
Annual Crop	1994-03-25	339.597	0	0
Annual Crop	1994-03-26	339.54	0	0
Annual Crop	1994-03-27	339.491	0	0
Annual Crop	1994-03-28	339.446	0	0
Annual Crop	1994-03-29	339.13	0	0
Annual Crop	1994-03-30	338.676	0	0
Annual Crop	1994-03-31	338.199	0	0
Annual Crop	1994-04-01	337.243	0	0
Annual Crop	1994-04-02	337.152	0	0
Annual Crop	1994-04-03	337.07	0	0
Annual Crop	1994-04-04	342.267	0	0
Annual Crop	1994-04-05	326.638	0	0
Annual Crop	1994-04-06	304.067	0	0
Annual Crop	1994-04-07	287.933	0	0
Annual Crop	1994-04-08	260.773	0	0
Annual Crop	1994-04-09	262.982	0	0
Annual Crop	1994-04-10	260.832	0	0
Annual Crop	1994-04-11	341.641	0	0
Annual Crop	1994-04-12	361.69	0	0
Annual Crop	1994-04-13	343.988	0	0
Annual Crop	1994-04-14	344.054	0	0
Annual Crop	1994-04-15	344.751	0	0
Annual Crop	1994-04-16	343.687	0	0
Annual Crop	1994-04-17	342.562	0	0
Annual Crop	1994-04-18	341.465	0	0
Annual Crop	1994-04-19	340.371	0	0
Annual Crop	1994-04-20	339.099	0	0
Annual Crop	1994-04-21	337.651	0	0
Annual Crop	1994-04-22	336.325	0	0
Annual Crop	1994-04-23	335.152	0	0
Annual Crop	1994-04-24	334.281	0	0
Annual Crop	1994-04-25	333.736	0	0
Annual Crop	1994-04-26	333.031	0	0
Annual Crop	1994-04-27	332.319	0	0
Annual Crop	1994-04-28	331.306	0	0
Annual Crop	1994-04-29	330.029	0	0
Annual Crop	1994-04-30	328.675	0	0
Annual Crop	1994-05-01	337.24	0	0
Annual Crop	1994-05-02	337.149	0	0
Annual Crop	1994-05-03	337.067	0	0
Annual Crop	1994-05-04	341.963	0	0
Annual Crop	1994-05-05	325.493	0	0
Annual Crop	1994-05-06	302.08	0	0
Annual Crop	1994-05-07	287.904	0	0
Annual Crop	1994-05-08	258.558	0	0
Annual Crop	1994-05-09	263.739	0	0
Annual Crop	1994-05-10	260.4	0	0
Annual Crop	1994-05-11	341.638	0	0
Annual Crop	1994-05-12	361.687	0	0
Annual Crop	1994-05-13	318.248	0	0
Annual Crop	1994-05-14	317.021	0	0
Annual Crop	1994-05-15	315.583	0	0
Annual Crop	1994-05-16	314.194	0	0
Annual Crop	1994-05-17	315.256	0	0
Annual Crop	1994-05-18	315.366	0	0
Annual Crop	1994-05-19	316.741	0	0
Annual Crop	1994-05-20	321.788	0	0
Annual Crop	1994-05-21	323.821	0	0
Annual Crop	1994-05-22	323.789	0	0
Annual Crop	1994-05-23	323.736	0	0
Annual Crop	1994-05-24	323.243	0	0
Annual Crop	1994-05-25	322.039	0	0
Annual Crop	1994-05-26	319.971	0	0
Annual Crop	1994-05-27	317.378	0	0
Annual Crop	1994-05-28	315.374	0	0
Annual Crop	1994-05-29	313.838	0	0
Annual Crop	1994-05-30	313.33	0	0
Annual Crop	1994-05-31	312.226	0	0
Annual Crop	1994-06-01	337.237	0	0
Annual Crop	1994-06-02	337.147	0	0
Annual Crop	1994-06-03	337.065	0	0
Annual Crop	1994-06-04	341.049	0	0
Annual Crop	1994-06-05	323.807	0	0
Annual Crop	1994-06-06	303.541	0	0
Annual Crop	1994-06-07	287.112	0	0
Annual Crop	1994-06-08	260.189	0	0
Annual Crop	1994-06-09	263.72	0	0
Annual Crop	1994-06-10	273.558	0	0
Annual Crop	1994-06-11	342.363	0	0
Annual Crop	1994-06-12	361.684	0	0
Annual Crop	1994-06-13	298.82	0	0
Annual Crop	1994-06-14	300.182	0	0
Annual Crop	1994-06-15	298.97	0	0
Annual Crop	1994-06-16	296.665	0	0
Annual Crop	1994-06-17	293.618	0	0
Annual Crop	1994-06-18	291.353	0	0
Annual Crop	1994-06-19	293.055	0	0
Annual Crop	1994-06-20	293.333	0	0
Annual Crop	1994-06-21	291.277	0	0
Annual Crop	1994-06-22	289.19	0	0
Annual Crop	1994-06-23	286.229	0	0
Annual Crop	1994-06-24	284.201	0	0
Annual Crop	1994-06-25	283.881	0	0
Annual Crop	1994-06-26	286.761	0	0
Annual Crop	1994-06-27	285.588	0	0
Annual Crop	1994-06-28	286.613	0	0
Annual Crop	1994-06-29	289.299	0	0
Annual Crop	1994-06-30	291.094	0	0
Annual Crop	1994-07-01	337.234	0	0
Annual Crop	1994-07-02	337.144	0	0
Annual Crop	1994-07-03	337.062	0	0
Annual Crop	1994-07-04	340.033	0	0
Annual Crop	1994-07-05	322.153	0	0
Annual Crop	1994-07-06	301.494	0	0
Annual Crop	1994-07-07	284.933	0	0
Annual Crop	1994-07-08	262.901	0	0
Annual Crop	1994-07-09	263.301	0	0
Annual Crop	1994-07-10	294.878	0	0
Annual Crop	1994-07-11	343.15	0	0
Annual Crop	1994-07-12	361.681	0	0
Annual Crop	1994-07-13	282.488	0	0
Annual Crop	1994-07-14	284.36	0	0
Annual Crop	1994-07-15	286.182	0	0
Annual Crop	1994-07-16	286.462	0	0
Annual Crop	1994-07-17	288.621	0	0
Annual Crop	1994-07-18	287.832	0	0
Annual Crop	1994-07-19	285.354	0	0
Annual Crop	1994-07-20	284.766	0	0
Annual Crop	1994-07-21	282.81	0	0
Annual Crop	1994-07-22	279.71	0	0
Annual Crop	1994-07-23	276.523	0	0
Annual Crop	1994-07-24	273.791	0	0
Annual Crop	1994-07-25	271.888	0	0
Annual Crop	1994-07-26	270.217	0	0
Annual Crop	1994-07-27	268.128	0	0
Annual Crop	1994-07-28	265.838	0	0
Annual Crop	1994-07-29	263.796	0	0
Annual Crop	1994-07-30	265.354	0	0
Annual Crop	1994-07-31	266.148	0	0
Annual Crop	1994-08-01	337.231	0	0
Annual Crop	1994-08-02	337.141	0	0
Annual Crop	1994-08-03	337.059	0	0
Annual Crop	1994-08-04	341.72	0	0
Annual Crop	1994-08-05	320.972	0	0
Annual Crop	1994-08-06	299.418	0	0
Annual Crop	1994-08-07	282.958	0	0
Annual Crop	1994-08-08	262.582	0	0
Annual Crop	1994-08-09	262.576	0	0
Annual Crop	1994-08-10	295.387	0	0
Annual Crop	1994-08-11	343.739	0	0
Annual Crop	1994-08-12	361.678	0	0
Annual Crop	1994-08-13	266.521	0	0
Annual Crop	1994-08-14	266.503	0	0
Annual Crop	1994-08-15	265.766	0	0
Annual Crop	1994-08-16	263.902	0	0
Annual Crop	1994-08-17	263.187	0	0
Annual Crop	1994-08-18	264.272	0	0
Annual Crop	1994-08-19	263.937	0	0
Annual Crop	1994-08-20	262.101	0	0
Annual Crop	1994-08-21	260.012	0	0
Annual Crop	1994-08-22	258.199	0	0
Annual Crop	1994-08-23	256.686	0	0
Annual Crop	1994-08-24	256.167	0	0
Annual Crop	1994-08-25	255.681	0	0
Annual Crop	1994-08-26	254.963	0	0
Annual Crop	1994-08-27	258.959	0	0
Annual Crop	1994-08-28	260.743	0	0
Annual Crop	1994-08-29	260.472	0	0
Annual Crop	1994-08-30	259.427	0	0
Annual Crop	1994-08-31	258.143	0	0
Annual Crop	1994-09-01	337.229	0	0
Annual Crop	1994-09-02	337.138	0	0
Annual Crop	1994-09-03	337.056	0	0
Annual Crop	1994-09-04	347.922	0	0
Annual Crop	1994-09-05	319.836	0	0
Annual Crop	1994-09-06	299.258	0	0
Annual Crop	1994-09-07	280.209	0	0
Annual Crop	1994-09-08	261.085	0	0
Annual Crop	1994-09-09	261.974	0	0
Annual Crop	1994-09-10	296.013	0	0
Annual Crop	1994-09-11	344.27	0	0
Annual Crop	1994-09-12	361.675	0	0
Annual Crop	1994-09-13	261.411	0	0
Annual Crop	1994-09-14	260.733	0	0
Annual Crop	1994-09-15	262.435	0	0
Annual Crop	1994-09-16	262.175	0	0
Annual Crop	1994-09-17	261.48	0	0
Annual Crop	1994-09-18	260.747	0	0
Annual Crop	1994-09-19	259.921	0	0
Annual Crop	1994-09-20	259.269	0	0
Annual Crop	1994-09-21	260.857	0	0
Annual Crop	1994-09-22	264.949	0	0
Annual Crop	1994-09-23	264.965	0	0
Annual Crop	1994-09-24	264.948	0	0
Annual Crop	1994-09-25	264.93	0	0
Annual Crop	1994-09-26	264.66	0	0
Annual Crop	1994-09-27	264.156	0	0
Annual Crop	1994-09-28	263.57	0	0
Annual Crop	1994-09-29	262.873	0	0
Annual Crop	1994-09-30	262.314	0	0
Annual Crop	1994-10-01	337.226	0	0
Annual Crop	1994-10-02	337.135	0	0
Annual Crop	1994-10-03	337.053	0	0
Annual Crop	1994-10-04	347.249	0	0
Annual Crop	1994-10-05	318.961	0	0
Annual Crop	1994-10-06	300.933	0	0
Annual Crop	1994-10-07	279.143	0	0
Annual Crop	1994-10-08	259.156	0	0
Annual Crop	1994-10-09	261.298	0	0
Annual Crop	1994-10-10	295.976	0	0
Annual Crop	1994-10-11	343.986	0	0
Annual Crop	1994-10-12	361.672	0	0
Annual Crop	1994-10-13	294.354	0	0
Annual Crop	1994-10-14	293.933	0	0
Annual Crop	1994-10-15	295.876	0	0
Annual Crop	1994-10-16	297.031	0	0
Annual Crop	1994-10-17	312.584	0	0
Annual Crop	1994-10-18	334.297	0	0
Annual Crop	1994-10-19	345.311	0	0
Annual Crop	1994-10-20	345.044	0	0
Annual Crop	1994-10-21	344.392	0	0
Annual Crop	1994-10-22	343.847	0	0
Annual Crop	1994-10-23	343.482	0	0
Annual Crop	1994-10-24	343.161	0	0
Annual Crop	1994-10-25	342.671	0	0
Annual Crop	1994-10-26	342.057	0	0
Annual Crop	1994-10-27	343.486	0	0
Annual Crop	1994-10-28	343.666	0	0
Annual Crop	1994-10-29	343.078	0	0
Annual Crop	1994-10-30	342.473	0	0
Annual Crop	1994-10-31	341.841	0	0
Annual Crop	1994-11-01	337.223	0	0
Annual Crop	1994-11-02	337.132	0	0
Annual Crop	1994-11-03	337.05	0	0
Annual Crop	1994-11-04	346.015	0	0
Annual Crop	1994-11-05	318.127	0	0
Annual Crop	1994-11-06	302.294	0	0
Annual Crop	1994-11-07	282.165	0	0
Annual Crop	1994-11-08	258.703	0	0
Annual Crop	1994-11-09	261.948	0	0
Annual Crop	1994-11-10	295.554	0	0
Annual Crop	1994-11-11	345.117	0	0
Annual Crop	1994-11-12	361.669	0	0
Annual Crop	1994-11-13	352.643	0	0
Annual Crop	1994-11-14	358.368	0	0
Annual Crop	1994-11-15	358.099	0	0
Annual Crop	1994-11-16	357.729	0	0
Annual Crop	1994-11-17	357.994	0	0
Annual Crop	1994-11-18	359.843	0	0
Annual Crop	1994-11-19	359.84	0	0
Annual Crop	1994-11-20	359.837	0	0
Annual Crop	1994-11-21	359.834	0	0
Annual Crop	1994-11-22	359.831	0	0
Annual Crop	1994-11-23	359.828	0	0
Annual Crop	1994-11-24	359.825	0	0
Annual Crop	1994-11-25	359.822	0	0
Annual Crop	1994-11-26	359.819	0	0
Annual Crop	1994-11-27	359.816	0	0
Annual Crop	1994-11-28	359.813	0	0
Annual Crop	1994-11-29	359.81	0	0
Annual Crop	1994-11-30	359.808	0	0
Annual Crop	1994-12-01	337.22	0	0
Annual Crop	1994-12-02	337.129	0	0
Annual Crop	1994-12-03	337.047	0	0
Annual Crop	1994-12-04	345.048	0	0
Annual Crop	1994-12-05	317.409	0	0
Annual Crop	1994-12-06	301.093	0	0
Annual Crop	1994-12-07	282.139	0	0
Annual Crop	1994-12-08	264.64	0	0
Annual Crop	1994-12-09	262.222	0	0
Annual Crop	1994-12-10	294.812	0	0
Annual Crop	1994-12-11	348.422	0	0
Annual Crop	1994-12-12	361.666	0	0
Annual Crop	1994-12-13	361.663	0	0
Annual Crop	1994-12-14	361.66	0	0
Annual Crop	1994-12-15	361.657	0	0
Annual Crop	1994-12-16	361.654	0	0
Annual Crop	1994-12-17	361.651	0	0
Annual Crop	1994-12-18	361.649	0	0
Annual Crop	1994-12-19	361.646	0	0
Annual Crop	1994-12-20	361.643	0	0
Annual Crop	1994-12-21	361.64	0	0
Annual Crop	1994-12-22	361.637	0	0
Annual Crop	1994-12-23	361.634	0	0
Annual Crop	1994-12-24	361.631	0	0
Annual Crop	1994-12-25	361.628	0	0
Annual Crop	1994-12-26	361.625	0	0
Annual Crop	1994-12-27	361.622	0	0
Annual Crop	1994-12-28	361.619	0	0
Annual Crop	1994-12-29	361.616	0	0
Annual Crop	1994-12-30	361.613	0	0
Annual Crop	1994-12-31	361.61	0	0
Annual Crop	1995-01-01	361.608	0	0
Annual Crop	1995-01-02	361.517	0	0
Annual Crop	1995-01-03	361.435	0	0
Annual Crop	1995-01-04	361.344	0	0
Annual Crop	1995-01-05	361.164	0	0
Annual Crop	1995-01-06	368.099	0	0
Annual Crop	1995-01-07	334.837	0	0
Annual Crop	1995-01-08	277.621	0	0
Annual Crop	1995-01-09	273.381	0	0
Annual Crop	1995-01-10	282.176	0	0
Annual Crop	1995-01-11	307.24	0	0
Annual Crop	1995-01-12	309.27	0	0
Annual Crop	1995-01-13	361.572	0	0
Annual Crop	1995-01-14	361.569	0	0
Annual Crop	1995-01-15	361.567	0	0
Annual Crop	1995-01-16	361.564	0	0
Annual Crop	1995-01-17	361.561	0	0
Annual Crop	1995-01-18	361.558	0	0
Annual Crop	1995-01-19	361.555	0	0
Annual Crop	1995-01-20	361.552	0	0
Annual Crop	1995-01-21	361.549	0	0
Annual Crop	1995-01-22	361.546	0	0
Annual Crop	1995-01-23	361.543	0	0
Annual Crop	1995-01-24	361.54	0	0
Annual Crop	1995-01-25	361.537	0	0
Annual Crop	1995-01-26	361.534	0	0
Annual Crop	1995-01-27	361.531	0	0
Annual Crop	1995-01-28	361.528	0	0
Annual Crop	1995-01-29	361.525	0	0
Annual Crop	1995-01-30	361.522	0	0
Annual Crop	1995-01-31	361.52	0	0
Annual Crop	1995-02-01	361.605	0	0
Annual Crop	1995-02-02	361.514	0	0
Annual Crop	1995-02-03	361.432	0	0
Annual Crop	1995-02-04	361.341	0	0
Annual Crop	1995-02-05	360.416	0	0
Annual Crop	1995-02-06	366.115	0	0
Annual Crop	1995-02-07	332.376	0	0
Annual Crop	1995-02-08	276.615	0	0
Annual Crop	1995-02-09	272.573	0	0
Annual Crop	1995-02-10	281.634	0	0
Annual Crop	1995-02-11	309.481	0	0
Annual Crop	1995-02-12	309.262	0	0
Annual Crop	1995-02-13	361.481	0	0
Annual Crop	1995-02-14	361.479	0	0
Annual Crop	1995-02-15	361.476	0	0
Annual Crop	1995-02-16	361.473	0	0
Annual Crop	1995-02-17	361.47	0	0
Annual Crop	1995-02-18	361.467	0	0
Annual Crop	1995-02-19	361.464	0	0
Annual Crop	1995-02-20	361.461	0	0
Annual Crop	1995-02-21	361.458	0	0
Annual Crop	1995-02-22	361.455	0	0
Annual Crop	1995-02-23	361.452	0	0
Annual Crop	1995-02-24	361.449	0	0
Annual Crop	1995-02-25	361.446	0	0
Annual Crop	1995-02-26	361.443	0	0
Annual Crop	1995-02-27	361.44	0	0
Annual Crop	1995-02-28	361.438	0	0
Annual Crop	1995-03-01	361.602	0	0
Annual Crop	1995-03-02	361.511	0	0
Annual Crop	1995-03-03	361.429	0	0
Annual Crop	1995-03-04	361.338	0	0
Annual Crop	1995-03-05	360.414	0	0
Annual Crop	1995-03-06	364.051	0	0
Annual Crop	1995-03-07	329.999	0	0
Annual Crop	1995-03-08	274.771	0	0
Annual Crop	1995-03-09	271.828	0	0
Annual Crop	1995-03-10	281.141	0	0
Annual Crop	1995-03-11	309.474	0	0
Annual Crop	1995-03-12	309.255	0	0
Annual Crop	1995-03-13	361.399	0	0
Annual Crop	1995-03-14	361.397	0	0
Annual Crop	1995-03-15	361.394	0	0
Annual Crop	1995-03-16	361.391	0	0
Annual Crop	1995-03-17	361.388	0	0
Annual Crop	1995-03-18	361.385	0	0
Annual Crop	1995-03-19	361.382	0	0
Annual Crop	1995-03-20	361.379	0	0
Annual Crop	1995-03-21	361.376	0	0
Annual Crop	1995-03-22	361.373	0	0
Annual Crop	1995-03-23	361.37	0	0
Annual Crop	1995-03-24	361.367	0	0
Annual Crop	1995-03-25	361.364	0	0
Annual Crop	1995-03-26	361.361	0	0
Annual Crop	1995-03-27	361.358	0	0
Annual Crop	1995-03-28	361.356	0	0
Annual Crop	1995-03-29	361.353	0	0
Annual Crop	1995-03-30	361.35	0	0
Annual Crop	1995-03-31	361.347	0	0
Annual Crop	1995-04-01	361.599	0	0
Annual Crop	1995-04-02	361.508	0	0
Annual Crop	1995-04-03	361.426	0	0
Annual Crop	1995-04-04	361.335	0	0
Annual Crop	1995-04-05	360.336	0	0
Annual Crop	1995-04-06	361.763	0	0
Annual Crop	1995-04-07	327.171	0	0
Annual Crop	1995-04-08	272.736	0	0
Annual Crop	1995-04-09	271.144	0	0
Annual Crop	1995-04-10	280.604	0	0
Annual Crop	1995-04-11	309.467	0	0
Annual Crop	1995-04-12	309.248	0	0
Annual Crop	1995-04-13	361.244	0	0
Annual Crop	1995-04-14	361.128	0	0
Annual Crop	1995-04-15	361.06	0	0
Annual Crop	1995-04-16	362.023	0	0
Annual Crop	1995-04-17	362.133	0	0
Annual Crop	1995-04-18	362.324	0	0
Annual Crop	1995-04-19	362.501	0	0
Annual Crop	1995-04-20	362.363	0	0
Annual Crop	1995-04-21	362.226	0	0
Annual Crop	1995-04-22	362.089	0	0
Annual Crop	1995-04-23	361.953	0	0
Annual Crop	1995-04-24	361.817	0	0
Annual Crop	1995-04-25	361.463	0	0
Annual Crop	1995-04-26	361.128	0	0
Annual Crop	1995-04-27	361.125	0	0
Annual Crop	1995-04-28	361.78	0	0
Annual Crop	1995-04-29	362.454	0	0
Annual Crop	1995-04-30	362.163	0	0
Annual Crop	1995-05-01	361.596	0	0
Annual Crop	1995-05-02	361.505	0	0
Annual Crop	1995-05-03	361.423	0	0
Annual Crop	1995-05-04	361.332	0	0
Annual Crop	1995-05-05	359.346	0	0
Annual Crop	1995-05-06	359.288	0	0
Annual Crop	1995-05-07	325.068	0	0
Annual Crop	1995-05-08	270.854	0	0
Annual Crop	1995-05-09	273.335	0	0
Annual Crop	1995-05-10	280.192	0	0
Annual Crop	1995-05-11	309.459	0	0
Annual Crop	1995-05-12	309.24	0	0
Annual Crop	1995-05-13	374.997	0	0
Annual Crop	1995-05-14	375.246	0	0
Annual Crop	1995-05-15	376.373	0	0
Annual Crop	1995-05-16	378.298	0	0
Annual Crop	1995-05-17	377.014	0	0
Annual Crop	1995-05-18	375.927	0	0
Annual Crop	1995-05-19	375.716	0	0
Annual Crop	1995-05-20	374.816	0	0
Annual Crop	1995-05-21	376.154	0	0
Annual Crop	1995-05-22	383.447	0	0
Annual Crop	1995-05-23	385.732	0	0
Annual Crop	1995-05-24	384.585	0	0
Annual Crop	1995-05-25	382.455	0	0
Annual Crop	1995-05-26	380.003	0	0
Annual Crop	1995-05-27	378.049	0	0
Annual Crop	1995-05-28	376.052	0	0
Annual Crop	1995-05-29	373.993	0	0
Annual Crop	1995-05-30	371.972	0	0
Annual Crop	1995-05-31	370.049	0	0
Annual Crop	1995-06-01	361.593	0	0
Annual Crop	1995-06-02	361.502	0	0
Annual Crop	1995-06-03	361.42	0	0
Annual Crop	1995-06-04	361.329	0	0
Annual Crop	1995-06-05	359.702	0	0
Annual Crop	1995-06-06	359.121	0	0
Annual Crop	1995-06-07	323.248	0	0
Annual Crop	1995-06-08	269.35	0	0
Annual Crop	1995-06-09	279.131	0	0
Annual Crop	1995-06-10	279.879	0	0
Annual Crop	1995-06-11	309.453	0	0
Annual Crop	1995-06-12	309.233	0	0
Annual Crop	1995-06-13	346.438	0	0
Annual Crop	1995-06-14	345.23	0	0
Annual Crop	1995-06-15	343.255	0	0
Annual Crop	1995-06-16	340.887	0	0
Annual Crop	1995-06-17	338.509	0	0
Annual Crop	1995-06-18	337.114	0	0
Annual Crop	1995-06-19	335.074	0	0
Annual Crop	1995-06-20	333.431	0	0
Annual Crop	1995-06-21	334.495	0	0
Annual Crop	1995-06-22	332.306	0	0
Annual Crop	1995-06-23	336.174	0	0
Annual Crop	1995-06-24	336.944	0	0
Annual Crop	1995-06-25	338.016	0	0
Annual Crop	1995-06-26	336.423	0	0
Annual Crop	1995-06-27	333.703	0	0
Annual Crop	1995-06-28	331.602	0	0
Annual Crop	1995-06-29	334.149	0	0
Annual Crop	1995-06-30	336.532	0	0
Annual Crop	1995-07-01	361.59	0	0
Annual Crop	1995-07-02	361.499	0	0
Annual Crop	1995-07-03	361.417	0	0
Annual Crop	1995-07-04	361.326	0	0
Annual Crop	1995-07-05	360.271	0	0
Annual Crop	1995-07-06	360.641	0	0
Annual Crop	1995-07-07	321.266	0	0
Annual Crop	1995-07-08	267.511	0	0
Annual Crop	1995-07-09	279.306	0	0
Annual Crop	1995-07-10	279.475	0	0
Annual Crop	1995-07-11	309.446	0	0
Annual Crop	1995-07-12	309.226	0	0
Annual Crop	1995-07-13	303.342	0	0
Annual Crop	1995-07-14	300.143	0	0
Annual Crop	1995-07-15	298.286	0	0
Annual Crop	1995-07-16	299.14	0	0
Annual Crop	1995-07-17	300.011	0	0
Annual Crop	1995-07-18	299.608	0	0
Annual Crop	1995-07-19	298.957	0	0
Annual Crop	1995-07-20	296.638	0	0
Annual Crop	1995-07-21	294.493	0	0
Annual Crop	1995-07-22	292.393	0	0
Annual Crop	1995-07-23	291.094	0	0
Annual Crop	1995-07-24	290.04	0	0
Annual Crop	1995-07-25	287.998	0	0
Annual Crop	1995-07-26	286.025	0	0
Annual Crop	1995-07-27	284.22	0	0
Annual Crop	1995-07-28	282.362	0	0
Annual Crop	1995-07-29	281.455	0	0
Annual Crop	1995-07-30	281.118	0	0
Annual Crop	1995-07-31	279.194	0	0
Annual Crop	1995-08-01	361.587	0	0
Annual Crop	1995-08-02	361.496	0	0
Annual Crop	1995-08-03	361.414	0	0
Annual Crop	1995-08-04	361.323	0	0
Annual Crop	1995-08-05	360.087	0	0
Annual Crop	1995-08-06	358.974	0	0
Annual Crop	1995-08-07	318.611	0	0
Annual Crop	1995-08-08	267.682	0	0
Annual Crop	1995-08-09	278.396	0	0
Annual Crop	1995-08-10	278.886	0	0
Annual Crop	1995-08-11	309.438	0	0
Annual Crop	1995-08-12	309.219	0	0
Annual Crop	1995-08-13	260.947	0	0
Annual Crop	1995-08-14	270.48	0	0
Annual Crop	1995-08-15	270.69	0	0
Annual Crop	1995-08-16	270.674	0	0
Annual Crop	1995-08-17	270.659	0	0
Annual Crop	1995-08-18	272.818	0	0
Annual Crop	1995-08-19	274.227	0	0
Annual Crop	1995-08-20	274.21	0	0
Annual Crop	1995-08-21	274.148	0	0
Annual Crop	1995-08-22	275.718	0	0
Annual Crop	1995-08-23	279.02	0	0
Annual Crop	1995-08-24	278.089	0	0
Annual Crop	1995-08-25	276.371	0	0
Annual Crop	1995-08-26	274.919	0	0
Annual Crop	1995-08-27	273.439	0	0
Annual Crop	1995-08-28	271.834	0	0
Annual Crop	1995-08-29	272.656	0	0
Annual Crop	1995-08-30	274.559	0	0
Annual Crop	1995-08-31	274.277	0	0
Annual Crop	1995-09-01	361.584	0	0
Annual Crop	1995-09-02	361.493	0	0
Annual Crop	1995-09-03	361.411	0	0
Annual Crop	1995-09-04	361.32	0	0
Annual Crop	1995-09-05	359.809	0	0
Annual Crop	1995-09-06	356.251	0	0
Annual Crop	1995-09-07	315.916	0	0
Annual Crop	1995-09-08	267.096	0	0
Annual Crop	1995-09-09	277.69	0	0
Annual Crop	1995-09-10	278.486	0	0
Annual Crop	1995-09-11	309.431	0	0
Annual Crop	1995-09-12	309.211	0	0
Annual Crop	1995-09-13	275.283	0	0
Annual Crop	1995-09-14	274.806	0	0
Annual Crop	1995-09-15	274.221	0	0
Annual Crop	1995-09-16	273.627	0	0
Annual Crop	1995-09-17	273.198	0	0
Annual Crop	1995-09-18	274.408	0	0
Annual Crop	1995-09-19	276.45	0	0
Annual Crop	1995-09-20	280.596	0	0
Annual Crop	1995-09-21	280.717	0	0
Annual Crop	1995-09-22	281.965	0	0
Annual Crop	1995-09-23	283.055	0	0
Annual Crop	1995-09-24	282.447	0	0
Annual Crop	1995-09-25	281.91	0	0
Annual Crop	1995-09-26	281.238	0	0
Annual Crop	1995-09-27	280.546	0	0
Annual Crop	1995-09-28	282.78	0	0
Annual Crop	1995-09-29	283.268	0	0
Annual Crop	1995-09-30	282.649	0	0
Annual Crop	1995-10-01	361.581	0	0
Annual Crop	1995-10-02	361.49	0	0
Annual Crop	1995-10-03	361.408	0	0
Annual Crop	1995-10-04	361.317	0	0
Annual Crop	1995-10-05	360.024	0	0
Annual Crop	1995-10-06	353.88	0	0
Annual Crop	1995-10-07	312.727	0	0
Annual Crop	1995-10-08	265.396	0	0
Annual Crop	1995-10-09	277.045	0	0
Annual Crop	1995-10-10	278.17	0	0
Annual Crop	1995-10-11	309.424	0	0
Annual Crop	1995-10-12	309.204	0	0
Annual Crop	1995-10-13	277.784	0	0
Annual Crop	1995-10-14	282.326	0	0
Annual Crop	1995-10-15	282.094	0	0
Annual Crop	1995-10-16	281.658	0	0
Annual Crop	1995-10-17	281.416	0	0
Annual Crop	1995-10-18	283.167	0	0
Annual Crop	1995-10-19	298.425	0	0
Annual Crop	1995-10-20	299.94	0	0
Annual Crop	1995-10-21	299.681	0	0
Annual Crop	1995-10-22	299.174	0	0
Annual Crop	1995-10-23	298.644	0	0
Annual Crop	1995-10-24	298.115	0	0
Annual Crop	1995-10-25	297.798	0	0
Annual Crop	1995-10-26	297.52	0	0
Annual Crop	1995-10-27	297.172	0	0
Annual Crop	1995-10-28	302.469	0	0
Annual Crop	1995-10-29	304.151	0	0
Annual Crop	1995-10-30	304.255	0	0
Annual Crop	1995-10-31	304.252	0	0
Annual Crop	1995-11-01	361.578	0	0
Annual Crop	1995-11-02	361.487	0	0
Annual Crop	1995-11-03	361.405	0	0
Annual Crop	1995-11-04	361.315	0	0
Annual Crop	1995-11-05	358.822	0	0
Annual Crop	1995-11-06	351.539	0	0
Annual Crop	1995-11-07	309.168	0	0
Annual Crop	1995-11-08	263.686	0	0
Annual Crop	1995-11-09	276.387	0	0
Annual Crop	1995-11-10	277.721	0	0
Annual Crop	1995-11-11	309.416	0	0
Annual Crop	1995-11-12	309.197	0	0
Annual Crop	1995-11-13	309.402	0	0
Annual Crop	1995-11-14	309.394	0	0
Annual Crop	1995-11-15	309.387	0	0
Annual Crop	1995-11-16	309.38	0	0
Annual Crop	1995-11-17	309.372	0	0
Annual Crop	1995-11-18	309.365	0	0
Annual Crop	1995-11-19	309.358	0	0
Annual Crop	1995-11-20	309.35	0	0
Annual Crop	1995-11-21	309.343	0	0
Annual Crop	1995-11-22	309.336	0	0
Annual Crop	1995-11-23	309.328	0	0
Annual Crop	1995-11-24	309.321	0	0
Annual Crop	1995-11-25	309.314	0	0
Annual Crop	1995-11-26	309.306	0	0
Annual Crop	1995-11-27	309.299	0	0
Annual Crop	1995-11-28	309.292	0	0
Annual Crop	1995-11-29	309.284	0	0
Annual Crop	1995-11-30	309.277	0	0
Annual Crop	1995-12-01	361.575	0	0
Annual Crop	1995-12-02	361.484	0	0
Annual Crop	1995-12-03	361.402	0	0
Annual Crop	1995-12-04	361.312	0	0
Annual Crop	1995-12-05	372.332	0	0
Annual Crop	1995-12-06	349.098	0	0
Annual Crop	1995-12-07	306.024	0	0
Annual Crop	1995-12-08	261.966	0	0
Annual Crop	1995-12-09	275.786	0	0
Annual Crop	1995-12-10	277.262	0	0
Annual Crop	1995-12-11	309.409	0	0
Annual Crop	1995-12-12	309.189	0	0
Annual Crop	1995-12-13	309.182	0	0
Annual Crop	1995-12-14	309.175	0	0
Annual Crop	1995-12-15	309.167	0	0
Annual Crop	1995-12-16	309.16	0	0
Annual Crop	1995-12-17	309.153	0	0
Annual Crop	1995-12-18	309.145	0	0
Annual Crop	1995-12-19	309.138	0	0
Annual Crop	1995-12-20	309.131	0	0
Annual Crop	1995-12-21	309.123	0	0
Annual Crop	1995-12-22	309.116	0	0
Annual Crop	1995-12-23	309.109	0	0
Annual Crop	1995-12-24	309.101	0	0
Annual Crop	1995-12-25	309.094	0	0
Annual Crop	1995-12-26	309.087	0	0
Annual Crop	1995-12-27	309.079	0	0
Annual Crop	1995-12-28	309.072	0	0
Annual Crop	1995-12-29	309.065	0	0
Annual Crop	1995-12-30	309.057	0	0
Annual Crop	1995-12-31	309.05	0	0
Annual Crop	1996-01-01	309.043	0	0
Annual Crop	1996-01-02	308.823	0	0
Annual Crop	1996-01-03	308.632	0	0
Annual Crop	1996-01-04	308.428	0	0
Annual Crop	1996-01-05	308.202	0	0
Annual Crop	1996-01-06	321.43	0	0
Annual Crop	1996-01-07	304.462	0	0
Annual Crop	1996-01-08	277.703	0	0
Annual Crop	1996-01-09	258.457	0	0
Annual Crop	1996-01-10	289.136	0	0
Annual Crop	1996-01-11	291.525	0	0
Annual Crop	1996-01-12	298.759	0	0
Annual Crop	1996-01-13	308.955	0	0
Annual Crop	1996-01-14	308.948	0	0
Annual Crop	1996-01-15	308.94	0	0
Annual Crop	1996-01-16	308.933	0	0
Annual Crop	1996-01-17	308.926	0	0
Annual Crop	1996-01-18	308.918	0	0
Annual Crop	1996-01-19	308.911	0	0
Annual Crop	1996-01-20	308.904	0	0
Annual Crop	1996-01-21	308.896	0	0
Annual Crop	1996-01-22	308.889	0	0
Annual Crop	1996-01-23	308.882	0	0
Annual Crop	1996-01-24	308.876	0	0
Annual Crop	1996-01-25	308.869	0	0
Annual Crop	1996-01-26	308.863	0	0
Annual Crop	1996-01-27	308.856	0	0
Annual Crop	1996-01-28	308.849	0	0
Annual Crop	1996-01-29	308.843	0	0
Annual Crop	1996-01-30	308.836	0	0
Annual Crop	1996-01-31	308.83	0	0
Annual Crop	1996-02-01	309.035	0	0
Annual Crop	1996-02-02	308.816	0	0
Annual Crop	1996-02-03	308.625	0	0
Annual Crop	1996-02-04	308.421	0	0
Annual Crop	1996-02-05	308.17	0	0
Annual Crop	1996-02-06	320.518	0	0
Annual Crop	1996-02-07	300.75	0	0
Annual Crop	1996-02-08	275.756	0	0
Annual Crop	1996-02-09	259.187	0	0
Annual Crop	1996-02-10	291.924	0	0
Annual Crop	1996-02-11	291.519	0	0
Annual Crop	1996-02-12	298.753	0	0
Annual Crop	1996-02-13	308.744	0	0
Annual Crop	1996-02-14	308.737	0	0
Annual Crop	1996-02-15	308.731	0	0
Annual Crop	1996-02-16	308.724	0	0
Annual Crop	1996-02-17	308.717	0	0
Annual Crop	1996-02-18	308.711	0	0
Annual Crop	1996-02-19	308.704	0	0
Annual Crop	1996-02-20	308.698	0	0
Annual Crop	1996-02-21	308.691	0	0
Annual Crop	1996-02-22	308.685	0	0
Annual Crop	1996-02-23	308.678	0	0
Annual Crop	1996-02-24	308.671	0	0
Annual Crop	1996-02-25	308.665	0	0
Annual Crop	1996-02-26	308.658	0	0
Annual Crop	1996-02-27	308.652	0	0
Annual Crop	1996-02-28	308.645	0	0
Annual Crop	1996-02-29	308.638	0	0
Annual Crop	1996-03-01	309.028	0	0
Annual Crop	1996-03-02	308.81	0	0
Annual Crop	1996-03-03	308.619	0	0
Annual Crop	1996-03-04	308.414	0	0
Annual Crop	1996-03-05	308.138	0	0
Annual Crop	1996-03-06	319.199	0	0
Annual Crop	1996-03-07	297.138	0	0
Annual Crop	1996-03-08	274.855	0	0
Annual Crop	1996-03-09	259.175	0	0
Annual Crop	1996-03-10	291.741	0	0
Annual Crop	1996-03-11	291.512	0	0
Annual Crop	1996-03-12	298.746	0	0
Annual Crop	1996-03-13	308.553	0	0
Annual Crop	1996-03-14	308.546	0	0
Annual Crop	1996-03-15	308.539	0	0
Annual Crop	1996-03-16	308.533	0	0
Annual Crop	1996-03-17	308.526	0	0
Annual Crop	1996-03-18	308.52	0	0
Annual Crop	1996-03-19	308.513	0	0
Annual Crop	1996-03-20	308.507	0	0
Annual Crop	1996-03-21	308.5	0	0
Annual Crop	1996-03-22	308.493	0	0
Annual Crop	1996-03-23	308.487	0	0
Annual Crop	1996-03-24	308.48	0	0
Annual Crop	1996-03-25	308.474	0	0
Annual Crop	1996-03-26	308.467	0	0
Annual Crop	1996-03-27	308.46	0	0
Annual Crop	1996-03-28	308.454	0	0
Annual Crop	1996-03-29	308.447	0	0
Annual Crop	1996-03-30	308.441	0	0
Annual Crop	1996-03-31	308.434	0	0
Annual Crop	1996-04-01	309.021	0	0
Annual Crop	1996-04-02	308.803	0	0
Annual Crop	1996-04-03	308.612	0	0
Annual Crop	1996-04-04	308.408	0	0
Annual Crop	1996-04-05	308.106	0	0
Annual Crop	1996-04-06	317.361	0	0
Annual Crop	1996-04-07	294.877	0	0
Annual Crop	1996-04-08	278.925	0	0
Annual Crop	1996-04-09	260.311	0	0
Annual Crop	1996-04-10	291.238	0	0
Annual Crop	1996-04-11	292.917	0	0
Annual Crop	1996-04-12	298.739	0	0
Annual Crop	1996-04-13	308.348	0	0
Annual Crop	1996-04-14	308.342	0	0
Annual Crop	1996-04-15	308.335	0	0
Annual Crop	1996-04-16	308.329	0	0
Annual Crop	1996-04-17	308.322	0	0
Annual Crop	1996-04-18	308.315	0	0
Annual Crop	1996-04-19	308.309	0	0
Annual Crop	1996-04-20	308.302	0	0
Annual Crop	1996-04-21	308.296	0	0
Annual Crop	1996-04-22	308.289	0	0
Annual Crop	1996-04-23	308.282	0	0
Annual Crop	1996-04-24	308.276	0	0
Annual Crop	1996-04-25	308.269	0	0
Annual Crop	1996-04-26	308.263	0	0
Annual Crop	1996-04-27	308.256	0	0
Annual Crop	1996-04-28	308.25	0	0
Annual Crop	1996-04-29	308.243	0	0
Annual Crop	1996-04-30	308.226	0	0
Annual Crop	1996-05-01	309.013	0	0
Annual Crop	1996-05-02	308.797	0	0
Annual Crop	1996-05-03	308.605	0	0
Annual Crop	1996-05-04	308.401	0	0
Annual Crop	1996-05-05	308.074	0	0
Annual Crop	1996-05-06	322.586	0	0
Annual Crop	1996-05-07	293.651	0	0
Annual Crop	1996-05-08	279.542	0	0
Annual Crop	1996-05-09	267.028	0	0
Annual Crop	1996-05-10	290.763	0	0
Annual Crop	1996-05-11	294.941	0	0
Annual Crop	1996-05-12	298.733	0	0
Annual Crop	1996-05-13	307.855	0	0
Annual Crop	1996-05-14	309.553	0	0
Annual Crop	1996-05-15	313.455	0	0
Annual Crop	1996-05-16	314.712	0	0
Annual Crop	1996-05-17	320.747	0	0
Annual Crop	1996-05-18	325.963	0	0
Annual Crop	1996-05-19	328.349	0	0
Annual Crop	1996-05-20	333.777	0	0
Annual Crop	1996-05-21	333.722	0	0
Annual Crop	1996-05-22	333.667	0	0
Annual Crop	1996-05-23	333.158	0	0
Annual Crop	1996-05-24	331.567	0	0
Annual Crop	1996-05-25	329.459	0	0
Annual Crop	1996-05-26	327.237	0	0
Annual Crop	1996-05-27	325.391	0	0
Annual Crop	1996-05-28	323.502	0	0
Annual Crop	1996-05-29	321.319	0	0
Annual Crop	1996-05-30	320.43	0	0
Annual Crop	1996-05-31	320.574	0	0
Annual Crop	1996-06-01	309.006	0	0
Annual Crop	1996-06-02	308.79	0	0
Annual Crop	1996-06-03	308.599	0	0
Annual Crop	1996-06-04	308.394	0	0
Annual Crop	1996-06-05	308.041	0	0
Annual Crop	1996-06-06	324.562	0	0
Annual Crop	1996-06-07	292.21	0	0
Annual Crop	1996-06-08	277.515	0	0
Annual Crop	1996-06-09	267.981	0	0
Annual Crop	1996-06-10	290.327	0	0
Annual Crop	1996-06-11	297.619	0	0
Annual Crop	1996-06-12	298.726	0	0
Annual Crop	1996-06-13	309.415	0	0
Annual Crop	1996-06-14	307.841	0	0
Annual Crop	1996-06-15	305.881	0	0
Annual Crop	1996-06-16	302.984	0	0
Annual Crop	1996-06-17	299.937	0	0
Annual Crop	1996-06-18	299.678	0	0
Annual Crop	1996-06-19	301.404	0	0
Annual Crop	1996-06-20	308.871	0	0
Annual Crop	1996-06-21	308.838	0	0
Annual Crop	1996-06-22	308.805	0	0
Annual Crop	1996-06-23	309.038	0	0
Annual Crop	1996-06-24	312.277	0	0
Annual Crop	1996-06-25	310.696	0	0
Annual Crop	1996-06-26	310.571	0	0
Annual Crop	1996-06-27	308.065	0	0
Annual Crop	1996-06-28	306.327	0	0
Annual Crop	1996-06-29	309.867	0	0
Annual Crop	1996-06-30	307.692	0	0
Annual Crop	1996-07-01	308.999	0	0
Annual Crop	1996-07-02	308.783	0	0
Annual Crop	1996-07-03	308.592	0	0
Annual Crop	1996-07-04	308.388	0	0
Annual Crop	1996-07-05	308.009	0	0
Annual Crop	1996-07-06	323.718	0	0
Annual Crop	1996-07-07	291.328	0	0
Annual Crop	1996-07-08	276.317	0	0
Annual Crop	1996-07-09	268.199	0	0
Annual Crop	1996-07-10	289.866	0	0
Annual Crop	1996-07-11	298.917	0	0
Annual Crop	1996-07-12	298.72	0	0
Annual Crop	1996-07-13	289.13	0	0
Annual Crop	1996-07-14	287.267	0	0
Annual Crop	1996-07-15	285.072	0	0
Annual Crop	1996-07-16	283.31	0	0
Annual Crop	1996-07-17	283.926	0	0
Annual Crop	1996-07-18	282.26	0	0
Annual Crop	1996-07-19	281.949	0	0
Annual Crop	1996-07-20	284.407	0	0
Annual Crop	1996-07-21	284.836	0	0
Annual Crop	1996-07-22	284.816	0	0
Annual Crop	1996-07-23	284.655	0	0
Annual Crop	1996-07-24	285.048	0	0
Annual Crop	1996-07-25	284.841	0	0
Annual Crop	1996-07-26	283.832	0	0
Annual Crop	1996-07-27	284.478	0	0
Annual Crop	1996-07-28	284.355	0	0
Annual Crop	1996-07-29	283.209	0	0
Annual Crop	1996-07-30	281.685	0	0
Annual Crop	1996-07-31	279.82	0	0
Annual Crop	1996-08-01	308.991	0	0
Annual Crop	1996-08-02	308.777	0	0
Annual Crop	1996-08-03	308.586	0	0
Annual Crop	1996-08-04	308.381	0	0
Annual Crop	1996-08-05	307.977	0	0
Annual Crop	1996-08-06	321.539	0	0
Annual Crop	1996-08-07	291.957	0	0
Annual Crop	1996-08-08	275.059	0	0
Annual Crop	1996-08-09	268.184	0	0
Annual Crop	1996-08-10	289.38	0	0
Annual Crop	1996-08-11	298.911	0	0
Annual Crop	1996-08-12	298.713	0	0
Annual Crop	1996-08-13	266.186	0	0
Annual Crop	1996-08-14	264.541	0	0
Annual Crop	1996-08-15	262.636	0	0
Annual Crop	1996-08-16	260.644	0	0
Annual Crop	1996-08-17	258.86	0	0
Annual Crop	1996-08-18	260.755	0	0
Annual Crop	1996-08-19	261.173	0	0
Annual Crop	1996-08-20	261.906	0	0
Annual Crop	1996-08-21	264.688	0	0
Annual Crop	1996-08-22	268.219	0	0
Annual Crop	1996-08-23	266.404	0	0
Annual Crop	1996-08-24	264.64	0	0
Annual Crop	1996-08-25	263.083	0	0
Annual Crop	1996-08-26	261.557	0	0
Annual Crop	1996-08-27	259.934	0	0
Annual Crop	1996-08-28	258.401	0	0
Annual Crop	1996-08-29	256.902	0	0
Annual Crop	1996-08-30	255.35	0	0
Annual Crop	1996-08-31	254.234	0	0
Annual Crop	1996-09-01	308.984	0	0
Annual Crop	1996-09-02	308.77	0	0
Annual Crop	1996-09-03	308.579	0	0
Annual Crop	1996-09-04	308.375	0	0
Annual Crop	1996-09-05	307.945	0	0
Annual Crop	1996-09-06	319.162	0	0
Annual Crop	1996-09-07	290.748	0	0
Annual Crop	1996-09-08	273.249	0	0
Annual Crop	1996-09-09	272.13	0	0
Annual Crop	1996-09-10	288.923	0	0
Annual Crop	1996-09-11	298.904	0	0
Annual Crop	1996-09-12	298.707	0	0
Annual Crop	1996-09-13	277.84	0	0
Annual Crop	1996-09-14	277.822	0	0
Annual Crop	1996-09-15	277.805	0	0
Annual Crop	1996-09-16	277.522	0	0
Annual Crop	1996-09-17	276.96	0	0
Annual Crop	1996-09-18	276.428	0	0
Annual Crop	1996-09-19	275.889	0	0
Annual Crop	1996-09-20	275.995	0	0
Annual Crop	1996-09-21	276.003	0	0
Annual Crop	1996-09-22	279.391	0	0
Annual Crop	1996-09-23	279.278	0	0
Annual Crop	1996-09-24	280.496	0	0
Annual Crop	1996-09-25	280.263	0	0
Annual Crop	1996-09-26	283.451	0	0
Annual Crop	1996-09-27	283.887	0	0
Annual Crop	1996-09-28	283.866	0	0
Annual Crop	1996-09-29	283.637	0	0
Annual Crop	1996-09-30	284.61	0	0
Annual Crop	1996-10-01	308.977	0	0
Annual Crop	1996-10-02	308.764	0	0
Annual Crop	1996-10-03	308.572	0	0
Annual Crop	1996-10-04	308.368	0	0
Annual Crop	1996-10-05	307.912	0	0
Annual Crop	1996-10-06	316.772	0	0
Annual Crop	1996-10-07	289.604	0	0
Annual Crop	1996-10-08	271.378	0	0
Annual Crop	1996-10-09	274.3	0	0
Annual Crop	1996-10-10	288.475	0	0
Annual Crop	1996-10-11	298.898	0	0
Annual Crop	1996-10-12	298.7	0	0
Annual Crop	1996-10-13	287.161	0	0
Annual Crop	1996-10-14	286.925	0	0
Annual Crop	1996-10-15	287.328	0	0
Annual Crop	1996-10-16	286.916	0	0
Annual Crop	1996-10-17	286.609	0	0
Annual Crop	1996-10-18	286.334	0	0
Annual Crop	1996-10-19	285.947	0	0
Annual Crop	1996-10-20	287.202	0	0
Annual Crop	1996-10-21	289.514	0	0
Annual Crop	1996-10-22	293.33	0	0
Annual Crop	1996-10-23	293.303	0	0
Annual Crop	1996-10-24	293.08	0	0
Annual Crop	1996-10-25	292.765	0	0
Annual Crop	1996-10-26	292.544	0	0
Annual Crop	1996-10-27	292.351	0	0
Annual Crop	1996-10-28	292.041	0	0
Annual Crop	1996-10-29	291.71	0	0
Annual Crop	1996-10-30	291.551	0	0
Annual Crop	1996-10-31	291.532	0	0
Annual Crop	1996-11-01	308.969	0	0
Annual Crop	1996-11-02	308.757	0	0
Annual Crop	1996-11-03	308.566	0	0
Annual Crop	1996-11-04	308.362	0	0
Annual Crop	1996-11-05	307.88	0	0
Annual Crop	1996-11-06	314.44	0	0
Annual Crop	1996-11-07	290.188	0	0
Annual Crop	1996-11-08	269.526	0	0
Annual Crop	1996-11-09	277.812	0	0
Annual Crop	1996-11-10	288.048	0	0
Annual Crop	1996-11-11	298.891	0	0
Annual Crop	1996-11-12	298.693	0	0
Annual Crop	1996-11-13	298.878	0	0
Annual Crop	1996-11-14	298.871	0	0
Annual Crop	1996-11-15	298.865	0	0
Annual Crop	1996-11-16	298.858	0	0
Annual Crop	1996-11-17	298.851	0	0
Annual Crop	1996-11-18	298.845	0	0
Annual Crop	1996-11-19	298.838	0	0
Annual Crop	1996-11-20	298.832	0	0
Annual Crop	1996-11-21	298.825	0	0
Annual Crop	1996-11-22	298.818	0	0
Annual Crop	1996-11-23	298.812	0	0
Annual Crop	1996-11-24	298.805	0	0
Annual Crop	1996-11-25	298.799	0	0
Annual Crop	1996-11-26	298.792	0	0
Annual Crop	1996-11-27	298.786	0	0
Annual Crop	1996-11-28	298.779	0	0
Annual Crop	1996-11-29	298.772	0	0
Annual Crop	1996-11-30	298.766	0	0
Annual Crop	1996-12-01	308.962	0	0
Annual Crop	1996-12-02	308.75	0	0
Annual Crop	1996-12-03	308.559	0	0
Annual Crop	1996-12-04	308.355	0	0
Annual Crop	1996-12-05	307.861	0	0
Annual Crop	1996-12-06	311.927	0	0
Annual Crop	1996-12-07	290.817	0	0
Annual Crop	1996-12-08	267.816	0	0
Annual Crop	1996-12-09	277.858	0	0
Annual Crop	1996-12-10	287.601	0	0
Annual Crop	1996-12-11	298.884	0	0
Annual Crop	1996-12-12	298.687	0	0
Annual Crop	1996-12-13	298.68	0	0
Annual Crop	1996-12-14	298.673	0	0
Annual Crop	1996-12-15	298.667	0	0
Annual Crop	1996-12-16	298.66	0	0
Annual Crop	1996-12-17	298.654	0	0
Annual Crop	1996-12-18	298.647	0	0
Annual Crop	1996-12-19	298.641	0	0
Annual Crop	1996-12-20	298.634	0	0
Annual Crop	1996-12-21	298.627	0	0
Annual Crop	1996-12-22	298.621	0	0
Annual Crop	1996-12-23	298.614	0	0
Annual Crop	1996-12-24	298.608	0	0
Annual Crop	1996-12-25	298.601	0	0
Annual Crop	1996-12-26	298.594	0	0
Annual Crop	1996-12-27	298.588	0	0
Annual Crop	1996-12-28	298.581	0	0
Annual Crop	1996-12-29	298.575	0	0
Annual Crop	1996-12-30	298.568	0	0
Annual Crop	1996-12-31	298.561	0	0
Annual Crop	2002-01-01	300.604	0	0
Annual Crop	2002-01-02	300.377	0	0
Annual Crop	2002-01-03	300.172	0	0
Annual Crop	2002-01-04	299.945	0	0
Annual Crop	2002-01-05	307.507	0	0
Annual Crop	2002-01-06	307.989	0	0
Annual Crop	2002-01-07	291.322	0	0
Annual Crop	2002-01-08	272.277	0	0
Annual Crop	2002-01-09	289.142	0	0
Annual Crop	2002-01-10	293.547	0	0
Annual Crop	2002-01-11	307.621	0	0
Annual Crop	2002-01-12	317.889	0	0
Annual Crop	2002-01-13	300.516	0	0
Annual Crop	2002-01-14	300.509	0	0
Annual Crop	2002-01-15	300.502	0	0
Annual Crop	2002-01-16	300.495	0	0
Annual Crop	2002-01-17	300.487	0	0
Annual Crop	2002-01-18	300.48	0	0
Annual Crop	2002-01-19	300.473	0	0
Annual Crop	2002-01-20	300.465	0	0
Annual Crop	2002-01-21	300.458	0	0
Annual Crop	2002-01-22	300.451	0	0
Annual Crop	2002-01-23	300.443	0	0
Annual Crop	2002-01-24	300.436	0	0
Annual Crop	2002-01-25	300.429	0	0
Annual Crop	2002-01-26	300.421	0	0
Annual Crop	2002-01-27	300.414	0	0
Annual Crop	2002-01-28	300.407	0	0
Annual Crop	2002-01-29	300.399	0	0
Annual Crop	2002-01-30	300.392	0	0
Annual Crop	2002-01-31	300.385	0	0
Annual Crop	2002-02-01	300.597	0	0
Annual Crop	2002-02-02	300.37	0	0
Annual Crop	2002-02-03	300.165	0	0
Annual Crop	2002-02-04	299.938	0	0
Annual Crop	2002-02-05	306.69	0	0
Annual Crop	2002-02-06	306.287	0	0
Annual Crop	2002-02-07	289.61	0	0
Annual Crop	2002-02-08	270.724	0	0
Annual Crop	2002-02-09	289.91	0	0
Annual Crop	2002-02-10	293.373	0	0
Annual Crop	2002-02-11	307.614	0	0
Annual Crop	2002-02-12	317.882	0	0
Annual Crop	2002-02-13	300.289	0	0
Annual Crop	2002-02-14	300.282	0	0
Annual Crop	2002-02-15	300.275	0	0
Annual Crop	2002-02-16	300.267	0	0
Annual Crop	2002-02-17	300.26	0	0
Annual Crop	2002-02-18	300.253	0	0
Annual Crop	2002-02-19	300.245	0	0
Annual Crop	2002-02-20	300.238	0	0
Annual Crop	2002-02-21	300.231	0	0
Annual Crop	2002-02-22	300.224	0	0
Annual Crop	2002-02-23	300.216	0	0
Annual Crop	2002-02-24	300.209	0	0
Annual Crop	2002-02-25	300.202	0	0
Annual Crop	2002-02-26	300.194	0	0
Annual Crop	2002-02-27	300.187	0	0
Annual Crop	2002-02-28	300.18	0	0
Annual Crop	2002-03-01	300.59	0	0
Annual Crop	2002-03-02	300.363	0	0
Annual Crop	2002-03-03	300.158	0	0
Annual Crop	2002-03-04	299.931	0	0
Annual Crop	2002-03-05	305.503	0	0
Annual Crop	2002-03-06	304.505	0	0
Annual Crop	2002-03-07	287.779	0	0
Annual Crop	2002-03-08	270.161	0	0
Annual Crop	2002-03-09	289.853	0	0
Annual Crop	2002-03-10	292.933	0	0
Annual Crop	2002-03-11	307.606	0	0
Annual Crop	2002-03-12	317.874	0	0
Annual Crop	2002-03-13	300.084	0	0
Annual Crop	2002-03-14	300.077	0	0
Annual Crop	2002-03-15	300.07	0	0
Annual Crop	2002-03-16	300.062	0	0
Annual Crop	2002-03-17	300.055	0	0
Annual Crop	2002-03-18	300.048	0	0
Annual Crop	2002-03-19	300.04	0	0
Annual Crop	2002-03-20	300.033	0	0
Annual Crop	2002-03-21	300.026	0	0
Annual Crop	2002-03-22	300.018	0	0
Annual Crop	2002-03-23	300.011	0	0
Annual Crop	2002-03-24	300.004	0	0
Annual Crop	2002-03-25	299.996	0	0
Annual Crop	2002-03-26	299.989	0	0
Annual Crop	2002-03-27	299.982	0	0
Annual Crop	2002-03-28	299.974	0	0
Annual Crop	2002-03-29	299.967	0	0
Annual Crop	2002-03-30	299.96	0	0
Annual Crop	2002-03-31	299.952	0	0
Annual Crop	2002-04-01	300.582	0	0
Annual Crop	2002-04-02	300.355	0	0
Annual Crop	2002-04-03	300.15	0	0
Annual Crop	2002-04-04	299.923	0	0
Annual Crop	2002-04-05	304.656	0	0
Annual Crop	2002-04-06	302.923	0	0
Annual Crop	2002-04-07	291.654	0	0
Annual Crop	2002-04-08	271.187	0	0
Annual Crop	2002-04-09	289.532	0	0
Annual Crop	2002-04-10	295.811	0	0
Annual Crop	2002-04-11	307.599	0	0
Annual Crop	2002-04-12	317.867	0	0
Annual Crop	2002-04-13	299.857	0	0
Annual Crop	2002-04-14	299.85	0	0
Annual Crop	2002-04-15	299.834	0	0
Annual Crop	2002-04-16	302.207	0	0
Annual Crop	2002-04-17	304.278	0	0
Annual Crop	2002-04-18	304.248	0	0
Annual Crop	2002-04-19	304.219	0	0
Annual Crop	2002-04-20	304.19	0	0
Annual Crop	2002-04-21	304.161	0	0
Annual Crop	2002-04-22	304.131	0	0
Annual Crop	2002-04-23	304.265	0	0
Annual Crop	2002-04-24	304.878	0	0
Annual Crop	2002-04-25	304.849	0	0
Annual Crop	2002-04-26	304.82	0	0
Annual Crop	2002-04-27	304.79	0	0
Annual Crop	2002-04-28	306.301	0	0
Annual Crop	2002-04-29	307.875	0	0
Annual Crop	2002-04-30	307.395	0	0
Annual Crop	2002-05-01	300.575	0	0
Annual Crop	2002-05-02	300.348	0	0
Annual Crop	2002-05-03	300.143	0	0
Annual Crop	2002-05-04	299.916	0	0
Annual Crop	2002-05-05	305.637	0	0
Annual Crop	2002-05-06	301.27	0	0
Annual Crop	2002-05-07	292.089	0	0
Annual Crop	2002-05-08	269.325	0	0
Annual Crop	2002-05-09	289.558	0	0
Annual Crop	2002-05-10	297.954	0	0
Annual Crop	2002-05-11	307.592	0	0
Annual Crop	2002-05-12	317.86	0	0
Annual Crop	2002-05-13	321.337	0	0
Annual Crop	2002-05-14	321.379	0	0
Annual Crop	2002-05-15	321.663	0	0
Annual Crop	2002-05-16	321.141	0	0
Annual Crop	2002-05-17	319.899	0	0
Annual Crop	2002-05-18	318.401	0	0
Annual Crop	2002-05-19	317.027	0	0
Annual Crop	2002-05-20	315.538	0	0
Annual Crop	2002-05-21	314.136	0	0
Annual Crop	2002-05-22	313.858	0	0
Annual Crop	2002-05-23	314.777	0	0
Annual Crop	2002-05-24	313.523	0	0
Annual Crop	2002-05-25	312.895	0	0
Annual Crop	2002-05-26	312.363	0	0
Annual Crop	2002-05-27	310.768	0	0
Annual Crop	2002-05-28	309.771	0	0
Annual Crop	2002-05-29	309.656	0	0
Annual Crop	2002-05-30	311.541	0	0
Annual Crop	2002-05-31	309.742	0	0
Annual Crop	2002-06-01	300.568	0	0
Annual Crop	2002-06-02	300.341	0	0
Annual Crop	2002-06-03	300.136	0	0
Annual Crop	2002-06-04	299.909	0	0
Annual Crop	2002-06-05	305.701	0	0
Annual Crop	2002-06-06	300.584	0	0
Annual Crop	2002-06-07	293.057	0	0
Annual Crop	2002-06-08	267.753	0	0
Annual Crop	2002-06-09	289.167	0	0
Annual Crop	2002-06-10	297.423	0	0
Annual Crop	2002-06-11	307.81	0	0
Annual Crop	2002-06-12	317.852	0	0
Annual Crop	2002-06-13	320.083	0	0
Annual Crop	2002-06-14	318.602	0	0
Annual Crop	2002-06-15	316.118	0	0
Annual Crop	2002-06-16	313.372	0	0
Annual Crop	2002-06-17	311.062	0	0
Annual Crop	2002-06-18	310.264	0	0
Annual Crop	2002-06-19	311.301	0	0
[truncated: 8,959 more rows]

## Sheet: Table S3-data for Fig10
Table S3. Sensitivity of major hydrological processes to changes in stomatal resistance. Relative Change compared to Stomatal resistance 50.
	Discharge (%)	Peak Discharge (%)	Runoff (mm)	Peak SWE (%)	Infiltration (%)	ET (%)
Stomatal resistance 100	59.1149	10.4424	-16.8809	0	9.89763	-32.8569
Stomatal resistance 75	38.0044	7.09854	-8.14224	0	4.61367	-19.1694
Stomatal resistance 25	-26.854	-2.97843	4.00403	0	-0.503288	17.4565
