# Supplementary material for: Simulating the hydrological impacts of land use conversion from annual crop to perennial forage in the Canadian Prairies using the Cold Regions Hydrological Modelling platform
Source: Copernicus journal article supplement (doi:10.5194/hess-26-5917-2022), 2022-11-25
Supplement: Supplementary file [file hess-26-5917-2022-supplement-title-page.pdf › hess-26-5917-2022-supplement-title-page.pdf]

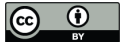

*Supplement of*

**Simulating the hydrological impacts of land use conversion from annual crop to perennial forage in the Canadian Prairies using the Cold Regions Hydrological Modelling platform**

**Marcos R. C. Cordeiro et al.**

*Correspondence to:* Kang Liang (kliang6@umd.edu)

- hess-26-5917-2022-supplement-title-page.pdf
- Supplement data
  - Supplement Data\_Fig 3-10.xlsx

The copyright of individual parts of the supplement might differ from the article licence.
